1 **Transcriptome-wide association study of risk of recurrence in Black and White breast cancer**  
2 **patients**

3 Achal Patel<sup>1</sup>, Montserrat García-Closas<sup>2,3</sup>, Andrew F. Olshan<sup>1,4</sup>, Charles M. Perou<sup>4,5,6</sup>, Melissa A.  
4 Troester<sup>1,6</sup>, Michael I. Love<sup>5,7\*</sup>, Arjun Bhattacharya<sup>8\*</sup>

5

6 1. Department of Epidemiology, Gillings School of Global Public Health, University of North Carolina-  
7 Chapel Hill, Chapel Hill, NC, USA

8 2. Division of Cancer Epidemiology and Genetics, National Cancer Institute, Bethesda, USA

9 3. Division of Genetics and Epidemiology, Institute of Cancer Research, London, UK

10 4. Lineberger Comprehensive Cancer Center, University of North Carolina-Chapel Hill, Chapel Hill, USA

11 5. Department of Genetics, University of North Carolina-Chapel Hill, Chapel Hill, NC, USA

12 6. Department of Pathology and Laboratory Medicine, University of North Carolina-Chapel Hill, Chapel  
13 Hill, NC, USA

14 7. Department of Biostatistics, Gillings School of Global Public Health, University of North Carolina-  
15 Chapel Hill, Chapel Hill, NC, USA

16 8. Department of Pathology and Laboratory Medicine, David Geffen School of Medicine, University of  
17 California-Los Angeles, Los Angeles, CA, USA

18

19 \*Correspondence can be directed to AB ([abtbhatt@ucla.edu](mailto:abtbhatt@ucla.edu)) and MIL ([milove@email.unc.edu](mailto:milove@email.unc.edu))

20

21 **ABSTRACT**

22 **Background:** Continuous risk of recurrence scores (CRS) based on PAM50 gene expression are vital  
23 prognostic tools for breast cancer (BC). Studies have shown that Black women (BW) have higher CRS  
24 than White women (WW). Although systemic injustices contribute substantially to BC disparities, evidence  
25 for biological and germline contributions is emerging. We investigated germline genetic associations with  
26 CRS and CRS disparity through a Transcriptome-Wide Association Study (TWAS).

27 **Methods:** In the Carolina Breast Cancer Study, using race-specific predictive models of tumor expression  
28 from germline genetics, we performed race-stratified (N=1,043 WW, 1083 BW) linear regressions of three  
29 CRS (ROR-S: PAM50 subtype score; Proliferation Score; ROR-P: ROR-S plus Proliferation Score) on  
30 imputed Genetically-Regulated tumor eXpression (GReX). Using Bayesian multivariate regression and  
31 adaptive shrinkage, we tested TWAS-significant genes for associations with PAM50 tumor expression  
32 and subtype to elucidate patterns of germline regulation underlying TWAS-gene and CRS associations.

33 **Results:** At FDR-adjusted  $P < 0.10$ , we detected 7 TWAS-genes among WW and 1 TWAS-gene among  
34 BW. Among WW, CRS showed positive associations with *MCM10*, *FAM64A*, *CCNB2*, and *MMP1* GReX  
35 and negative associations with *VAV3*, *PCSK6*, and *GNG11* GReX. Among BW, higher *MMP1* GReX  
36 predicted lower Proliferation score and ROR-P. TWAS-gene and PAM50 tumor expression associations  
37 highlighted potential mechanisms for TWAS-gene to CRS associations.

38 **Conclusions:** Among BC patients, we find differential germline associations with three CRS by race,  
39 underscoring the need for larger, more diverse datasets in molecular studies of BC. Our findings also  
40 suggest possible germline *trans*-regulation of PAM50 tumor expression, with potential implications for  
41 interpreting CRS in clinical settings.

42

43 **Keywords:** breast cancer recurrence, risk of recurrence, transcriptome-wide association study, molecular  
44 subtype, trans-eQTL mapping

45 **ABBREVIATIONS**

|    |      |                                        |
|----|------|----------------------------------------|
| 46 | BC   | Breast Cancer                          |
| 47 | BW   | Black Women                            |
| 48 | CBCS | Carolina Breast Cancer Study           |
| 49 | CRS  | Continuous Risk of recurrence Score    |
| 50 | eQTL | expression Quantitative Trait Locus    |
| 51 | ER   | Estrogen Receptor                      |
| 52 | GRex | Genetically-Regulated tumor eXpression |
| 53 | GWAS | Genome-Wide Association Study          |
| 54 | HR   | Hormone Receptor                       |
| 55 | LumA | Luminal A                              |
| 56 | LumB | Luminal B                              |
| 57 | ROR  | Risk of Recurrence                     |
| 58 | SCC  | Subtype-Centroid Correlations          |
| 59 | SNP  | Single Nucleotide Polymorphism         |
| 60 | TCGA | The Cancer Genome Atlas                |
| 61 | TWAS | Transcriptome-Wide Association Study   |
| 62 | WW   | White Women                            |

63 **INTRODUCTION (Manuscript Word Count = 3000)**

64 Tumor expression-based molecular profiling has improved clinical classification of breast cancer  
65 (BC) [1-3]. One tool is the PAM50 assay which integrates tumor expression of 50 genes (from  
66 approximately 1,900 “intrinsic” genes identified through microarray) to determine intrinsic molecular  
67 subtypes: Luminal A (LumA), Luminal B (LumB), Human epidermal growth factor 2-enriched (HER2-  
68 enriched), Basal-like, Normal-like [1, 4]. Continuous risk of recurrence scores (CRS) generated from  
69 PAM50 tumor expression have prognostic value in clinical settings. [5-7]. For node negative, hormone  
70 receptor (HR) positive/HER2 negative BC, ROR-PT (a CRS determined by PAM50-subtype score,  
71 PAM50-based Proliferation score, and tumor size) offers overall and late distant recurrence information;  
72 other multigene signatures (OncotypeDx and EPclin) provide similar prognostic information for clinical  
73 decision-making [7, 8].

74 In the Carolina Breast Cancer Study (CBCS), Black women (BW) with breast cancer have  
75 disproportionately higher CRS than White Women [9], with similar disparities in Oncotype Dx recurrence  
76 score [9, 10]. Systemic injustices, like disparities in healthcare access, explain a substantial proportion of  
77 breast cancer outcome disparities [11-14], but recent studies suggest germline genetic variation may also  
78 play a role in outcome disparity. In The Cancer Genome Atlas (TCGA), BW had substantially higher  
79 polygenic risk scores for the more aggressive ER-negative subtype than WW, suggesting differential  
80 genetic contributions towards BC and especially ER-negative BC incidence [15]. In a transcriptome-wide  
81 association study (TWAS) of BC mortality, germline-regulated gene expression of four genes was  
82 associated with mortality among BW and none associated among WW [16]. However, the role of germline  
83 genetic variation in relation to CRS and CRS disparity remains an important knowledge gap.

84 As racially-diverse genetic datasets typically have small samples of BW, gene-level association  
85 tests can be used to increase study power. These approaches include TWAS, which integrates  
86 relationships between single nucleotide polymorphisms (SNP) and gene expression with genome-wide  
87 association studies (GWAS) to prioritize gene-trait associations [17, 18]. TWAS has identified cancer  
88 susceptibility genes at loci previously undetected through GWAS, highlighting its improved power and  
89 interpretability [19-21]. Previous studies show that stratification of the entire TWAS (model training,

90 imputation, and association testing) is preferable in diverse populations, as models may perform poorly  
91 across ancestry groups and methods for TWAS in admixed populations are unavailable [16, 22].

92 Here, using data from the CBCS, which includes a large sample of Black BC patients with tumor  
93 gene expression data, we study race-specific germline genetic associations for CRS using TWAS. CRS  
94 included in this study are ROR-S (PAM50 subtype score), PAM50-based Proliferation score, and ROR-P  
95 (ROR-S + Proliferation score). Using race-specific predictive models for tumor expression from germline  
96 genetics, we identify sets of TWAS-genes associated with these CRS across BW and WW. We  
97 additionally investigate TWAS-genes for ROR-P for associations with PAM50 subtype and subtype-  
98 specific tumor gene expressions to elucidate germline contributions to PAM50 subtype, and how these  
99 mediate TWAS-gene and CRS associations. Unlike previous studies that correlated tumor gene  
100 expression (as opposed to germline-regulated tumor gene expression) with subtype or subtype-specific  
101 tumor gene expressions, TWAS enables directional interpretation of observed associations by ruling out  
102 reverse causality [17, 18].

103

## 104 **METHODS**

### 105 ***Data collection***

#### 106 *Study population*

107 The CBCS is a population-based study of North Carolina BC patients with three phases; study  
108 details have been previously described [23, 24]. Patients aged 20 to 74 were identified using rapid case  
109 ascertainment with the NC Central Cancer Registry with randomized recruitment to oversample self-  
110 identified Black and young women (ages 20-49) [9, 24]. Demographic and clinical data (age, menopausal  
111 status, body mass index, hormone receptor status, tumor stage, study phase, recurrence) were obtained  
112 through questionnaires and medical records. Recurrence data were available for CBCS Phase 3. The  
113 study was approved by the Office of Human Research Ethics at the University of North Carolina at  
114 Chapel Hill, and informed consent was obtained from each participant.

115

#### 116 *CBCS genotype data*

117 Genotypes were assayed on the OncoArray Consortium's custom SNP array (Illumina Infinium  
118 OncoArray) [25] and imputed using the 1000 Genomes Project (v3) as a reference panel for two-step  
119 phasing and imputation using SHAPEIT2 and IMPUTEv2 [26-29]. The DCEG Cancer Genomics  
120 Research Laboratory conducted genotype calling, quality control, and imputation [25]. We excluded  
121 variants with less than 1% minor allele frequency and deviations from Hardy-Weinberg equilibrium at  
122  $P < 10^{-8}$  [30, 31]. We intersected genotyping panels for BW and WW samples, resulting in 5,989,134  
123 autosomal variants and 334,391 variants on the X chromosome [32].

124

#### 125 *CBCS gene expression data*

126 Paraffin-embedded tumor blocks were assayed for gene expression of 406 BC-related and 11  
127 housekeeping genes using NanoString nCounter at the Translational Genomics Laboratory at UNC-  
128 Chapel Hill [4, 9]. As described previously, we eliminated samples with insufficient data quality using  
129 NanoStringQCPro [16, 33], scaled distributional difference between lanes with upper-quartile  
130 normalization [34], and removed two dimensions of unwanted technical and biological variation, estimated  
131 from housekeeping genes using RUVSeq [34, 35]. The current analysis included 1,199 samples with both  
132 genotype and gene expression data (628 BW, 571 WW).

133

#### 134 **Statistical analysis**

##### 135 *Overview of TWAS*

136 TWAS integrates expression data with GWAS to prioritize gene-trait associations through a two-  
137 step analysis (**Figure 1A-B**). First, using genetic and transcriptomic data, we trained predictive models of  
138 tumor gene expression using all SNPs within 0.5 Megabase of the gene [16, 18]. Second, we used these  
139 models to impute expression into an external GWAS panel to generate the Genetically-Regulated tumor  
140 eXpression (GReX) of a gene. This quantity represents the portion of tumor expression explained by *cis*-  
141 genetic regulation and is used to test for gene-trait associations with an outcome. By focusing on  
142 genetically regulated expression, TWAS avoids instances of expression-trait association that are not  
143 consequences of genetic variation but are driven by the effect of traits on expression. If sufficiently

144 heritable genes are assayed in the correct tissue, TWAS increases power to detect gene-trait  
145 associations and aids interpretability of results, as associations are mapped to individual genes [18, 36].

146

#### 147 *CRS TWAS in CBCS*

148 We adopted techniques from FUSION to train predictive models of tumor expression from *cis*-  
149 germline genotypes, as discussed previously [16, 18]. Motivated by strong associations between germline  
150 genetics and tumor expression in CBCS [16], for genes with non-zero *cis*-heritability at nominal  $P < 0.10$ ,  
151 we trained predictive models for covariate-residualized tumor expression with all *cis*-SNPs within 0.5  
152 Megabase using linear mixed modeling or elastic net regression (**Supplementary Methods,**  
153 **Supplementary Materials**). We selected models with five-fold cross-validation adjusted  $R^2 > 0.01$   
154 between predicted and observed expression values, resulting in 59 and 45 models for WW and BW,  
155 respectively (**Supplementary Data**). Using only germline genetics as an input, we imputed GReX in  
156 1,043 WW and 1,083 BW, respectively, in CBCS; for samples in both the training and imputation  
157 samples, GReX was imputed via cross-validation to minimize data leakage. We tested GReX for  
158 associations with ROR-S, Proliferation Score, and ROR-P using multiple linear regression adjusted for  
159 age, estrogen receptor (ER) status, tumor stage, and study phase [1]. We corrected for test-statistic bias  
160 and inflation using *bacon* and adjusted for multiple testing using the Benjamini-Hochberg procedure [37,  
161 38]. To compare germline effects with total (germline and post-transcriptional) effects on ROR, we  
162 assessed relationships between tumor expression of TWAS genes and CRS using similar linear models.  
163 We were underpowered to study time-to-recurrence due to small sample size, as recurrence data was  
164 collected only in CBCS Phase 3 (635 WW, 742 BW with GReX and recurrence data; 183 WW, 283 BW  
165 with tumor expression and recurrence data).

166

#### 167 *PAM50 assay and ROR-S, Proliferation score, and ROR-P calculation*

168 Using partition-around-medoid clustering, we calculated correlation with each subtype's centroid  
169 for study individuals based on PAM50 expressions (10 PAM50 genes per subtype); the largest subtype-  
170 centroid correlation defined the individual's molecular subtype [1]. ROR-S was determined via linear  
171 combination of the PAM50 subtype-centroid correlations (SCCs) [1]. Proliferation score was computed

172 using log-scale expression of 11 PAM50 genes while ROR-P was computed by combining ROR-S and  
173 Proliferation score.

174

#### 175 *Bayesian multivariate regressions and multivariate adaptive shrinkage*

176 To better understand germline *trans*-regulation of PAM50 tumor gene expression and germline  
177 contribution to subtype, and to understand how these mediate TWAS-gene and CRS associations, we  
178 assessed TWAS-genes (for ROR-P) in relation to SCCs and PAM50 tumor gene expressions (**Figure**  
179 **1C**). We found that none of our TWAS-genes were within 1 Megabase of PAM50 genes and that most  
180 TWAS-genes were not on the same chromosome as PAM50 genes (**Supplementary Table S1**). Existing  
181 gene-based mapping techniques for *trans*-expression quantitative trait loci (eQTL) (SNP and gene are  
182 separated by more than 1 Megabase) mapping include *trans*-PrediXcan and GBAT [39, 40]. We  
183 employed Bayesian multivariate linear regression (BtQTL) to account for correlation in multivariate  
184 outcomes (SCCs and PAM50 gene expression) in association testing. BtQTL improves power to detect  
185 significant *trans*-associations, especially when considering multiple genes with highly correlated (>0.5)  
186 expression (**Supplementary Methods, Supplementary Figures S1-S2, Supplementary Materials**).  
187 Lastly, we conducted adaptive shrinkage on BtQTL estimates using mashr, an empirical Bayes method to  
188 estimate patterns of similarity and improve accuracy in associations tests across multiple outcomes [41].  
189 mashr outputs revised posterior means, standard deviations, and corresponding measures of significance  
190 (local false sign rates).

191

## 192 **RESULTS**

### 193 **Association between GReX and risk of recurrence scores**

194 We performed race-specific TWAS for CRS to investigate the role of germline genetic variation in  
195 CRS and CRS racial disparity. We identified 8 genes (*MCM10*, *FAM64A*, *CCNB2*, *MMP1*, *VAV3*, *PCSK6*,  
196 *NDC80*, *MLPH*), 8 genes (*MCM10*, *FAM64A*, *CCNB2*, *MMP1*, *VAV3*, *NDC80*, *MLPH*, *EXO1*), and 10  
197 genes (*MCM10*, *FAM64A*, *CCNB2*, *MMP1*, *VAV3*, *PCSK6*, *GNG11*, *NDC80*, *MLPH*, *EXO1*) whose GReX  
198 was associated with ROR-S, proliferation, and ROR-P, respectively, in WW, and 1 gene (*MMP1*) whose  
199 GReX was associated with proliferation and ROR-P in BW at FDR-adjusted  $P < 0.10$  (**Figure 2A, 2B**). No



200 associations were detected between GReX and ROR-S among BW. We refer to genes with statistically  
201 significant TWAS associations (FDR-adjusted  $P < 0.10$ ) as TWAS-genes. Among these identified genes,  
202 only genes that are not part of the PAM50 panel (i.e., excluding *NDC80*, *MLPH*, *EXO1*) were considered  
203 in downstream permutation and TWAS-gene follow up analyses (**Figure 1C**), as we wished to focus  
204 investigation on relationship between non-PAM50 TWAS-genes and PAM50 (tumor) genes.

205 Among WW, increased GReX of *MCM10*, *FAM64A*, *CCNB2*, and *MMP1* were associated with  
206 higher CRS while increased GReX of *VAV3*, *PCSK6*, and *GNG11* were associated with lower CRS  
207 (**Figure 2A**). Among BW, increased GReX of *MMP1* was associated with lower CRS (Proliferation, ROR-  
208 P, but not ROR-S) (**Figure 2A**). To provide statistical context for variance in CRS explained by significant  
209 TWAS-genes, we permuted covariate-residualized CRS to generate a null distribution for adjusted  $R^2$   
210 between TWAS-genes and CRS. Across WW and BW, the observed  $R^2$  of TWAS-genes against CRS (7-  
211 10% among WW and 1% among BW) were statistically significant against the respective null distributions  
212 ( $P < 0.001$  among WW and  $P < 0.05$  among BW) (**Figure 2B**).

213 Associations between tumor expression of TWAS-genes and CRS were concordant, in terms of  
214 direction of association to germline-only effects among WW; findings were discordant among BW  
215 (**Supplementary Table S2-S3**). Permutation tests for analyses of tumor expression of TWAS-genes and  
216 CRS are available in **Supplementary Figure S3**.

217

### 218 **Associations between TWAS-genes and breast cancer molecular subtype**

219 Among WW, a one standard deviation increase in *FAM64A* and *CCNB2* GReX resulted in  
220 significantly increased Basal-like SCC while an identical increase in *VAV3*, *PCSK6*, and *GNG11* resulted  
221 in significantly increased Luminal A SCC. The magnitude of increase in correlation for respective  
222 subtypes per GReX gene was approximately 0.05, and most estimates had credible intervals that did not  
223 intersect the null. Among WW, associations between HER2-like SCC and GReX followed similar patterns  
224 to associations for the Basal-like subtype, although associations for HER2 were more precise (**Figure**  
225 **3A**). We found predominantly null associations for GReX for Luminal B SCC among WW (**Figure 3A**).  
226 Unlike in WW, for BW, an increase in *MMP1* GReX was not associated with Luminal A, HER2 or Basal-

227 like SCCs. Instead, among BW, *MMP1* GReX was significantly negatively associated with Luminal B  
228 SCC. Estimates from univariate regressions are provided in **Supplementary Tables S4-S7**.

229

### 230 **Association between TWAS-genes and PAM50 gene expression**

231 For both WW and BW, the pattern of associations between significant GReX and PAM50 tumor  
232 expression were predominantly congruent with observed associations for SCCs and CRS (**Figure 4**). In  
233 WW, a one standard deviation increase in *CCNB2* GReX was associated with significantly increased  
234 *ORC6L*, *PTTG1*, and *KIF2C* (Basal-like genes) expression and *UBE2T*, *MYBL2* (LumB genes)  
235 expression. By contrast, a one standard deviation increase in *PCSK6* GReX significantly increased  
236 *BAG1*, *FOXA1*, *MAPT*, and *NAT1* (LumA genes) expression (**Figure 4**). While increased *MMP1* GReX  
237 was associated with significantly increased expression of *ORC6L* (basal-like gene), *MYBL2*, and *BIRC5*  
238 (LumB genes) among WW, this was not the case among BW. Instead, increased *MMP1* GReX among  
239 BW was significantly associated with increased expression of *SLC39A6* (LumA gene) and decreased  
240 expression of *ACTR3B*, *PTTG1*, and *EXO1* (Basal-like genes) (**Figure 4**). **Supplementary Tables S8-**  
241 **S11** and **Figure 4** provide all TWAS-gene and PAM50 gene expression associations across WW and  
242 BW.

243

### 244 **DISCUSSION**

245 Through TWAS, we identified 7 and 1 genes among WW and BW, respectively, for which GReX  
246 was associated with CRS and underlying PAM50 expressions and subtype. Among WW, these 7 TWAS-  
247 genes explained between 7-10% of the variation in CRS, a large and statistically significant proportion of  
248 variance. Among BW, the singular TWAS-gene explained ~1% of the variation in Proliferation score and  
249 ROR-P. Differences in the number and effect of identified TWAS-genes by race may point to factors that  
250 warrant further investigation: (1) potentially greater contribution of *trans*-regulation in tumor gene  
251 expression in BW, as shown previously, and (2) potential racial differences in tumor methylation and  
252 somatic alternations, which could not be accounted for in CBCS[16, 42-47].

253 There are two key novel aspects to this study. First, existing literature on associations between  
254 tumor gene expression and recurrence (for which CRS are a proxy) cannot distinguish between genetic

255 and non-genetic component of effects [48]. Second, TWAS allows causal interpretation of observed  
256 associations. For instance, prior studies report *CCNB2* is upregulated in triple-negative breast cancers  
257 (TNBC) but were unable to determine whether increased *CCNB2* expression contributes to development  
258 or maintenance of TNBC or is part of the molecular response to cancer progression [49, 50]. By contrast,  
259 GReX is a function of only genetic variation. Thus, TWAS allows causal interpretation, subject to effective  
260 control for population stratification and minimal horizontal pleiotropy [17, 18].

261 Our WW-specific finding that prioritizes *MCM10*, *FAM64A*, and *CCNB2* associations with Basal-  
262 like and HER2-enriched subtypes and subtype-specific gene expressions are consistent with literature.  
263 Prior investigations in cohorts of primarily European ancestry have reported that *MCM10*, *FAM64A*, and  
264 *CCNB2* expression is higher in ER-negative than ER-positive tumors [49-51]. In studies that compared  
265 triple-negative and non-triple negative subtypes, higher *MCM10*, *FAM64A*, and *CCNB2* expression was  
266 detected in triple-negative BC [49, 50]. Histologically, HER2-enriched and Basal-like subtypes are  
267 typically ER-negative, and triple-negatives are similar to Basal-like subtypes [9, 52]. *MCM10*, *FAM64A*,  
268 and *CCNB2* are all implicated in cell cycle processes, including DNA replication [51, 53, 54]. Our WW-  
269 specific findings that GReX of *PCSK6* and *VAV3* associated with Luminal A and Luminal A specific gene  
270 expressions are also consistent with previous results of *PCSK6* and *VAV3* upregulation in ER-positive  
271 subtypes [55, 56].

272 Presently, little is known about germline genetic regulation of PAM50 tumor expression. In CBCS,  
273 we found that tumor expression of most PAM50 genes is not *cis*-heritable. Instead, observed TWAS-gene  
274 and PAM50 gene expression associations may implicate *trans*-gene regulation of the PAM50 signature.  
275 For instance, we found that *VAV3* GReX is significantly positively associated with tumor expression of  
276 *BAG1*, *FOXA1*, *MAPT*, and *NAT1* and nominally with increased tumor *ESR1* expression, all of which are  
277 Luminal A-specific genes. Such *trans*-genic regulation signals, especially in the case of *ESR1*, pose  
278 significant clinical and therapeutic implication if confirmed under experimental conditions. For example,  
279 *VAV3* activates *RAC1* which upregulates *ESR1* but such mechanistic evidence is sparse for other  
280 putative TWAS-gene to PAM50 gene associations [57, 58]. More generally, two of the TWAS-genes  
281 among WW (*FAM64A*, *PCSK6*) have been found to activate the oncogenic *STAT3* signaling pathway,  
282 housing many purported anti-cancer drug targets [59, 60].

283            Interestingly, we found *MMP1* GReX has divergent associations with ROR across race. There are  
284 a few potential explanations. First, the range of *MMP1* GReX was manifold among WW than BW,  
285 suggesting sparser *cis*-eQTL architecture of *MMP1* in BW and more influence from *trans*-acting signals.  
286 Potential differences in influence of germline genetics on tumor expression and ROR by race could be an  
287 artifact of divergent somatic or epigenetic factors that CBCS has not assayed [44-47]. Second, while  
288 studies generally report that *MMP1* tumor expression is higher in triple-negative and Basal-like breast  
289 cancer, one study reported that *MMP1* expression in tumor cells does not significantly differ by subtype  
290 [61-63]. Instead, Bostrom *et al.* reported that *MMP1* expression differs in stromal cells of patients with  
291 different subtypes [63]. There is evidence to suggest that tumor composition, including stromal and  
292 immune components, may influence BC progression in a subtype-specific manner and future studies  
293 should consider expression predictive models that integrate greater detail on tumor cell-type composition  
294 [64, 65].

295            There are a few limitations to this study. First, as CBCS used a custom Nanostring nCounter  
296 probeset for mRNA expression quantification, we could not analyze the whole human transcriptome.  
297 While this probeset may exclude several *cis*-heritable genes, CBCS contains one of the largest breast  
298 tumor transcriptomic datasets for Black women, allowing us to build well-powered race-specific predictive  
299 models, a pivotal step in transethnic TWAS. Second, CBCS lacked data on somatic amplifications and  
300 deletions, inclusion of which could enhance the performance of predictive models [66]. Third, as  
301 recurrence data was collected in a small subset with few recurrence events, we were unable to make a  
302 direct comparison between CRS and recurrence results, which may affect clinical generalizability.  
303 However, to our knowledge, CBCS is the largest resource of PAM50-based CRS data.

304            Our analysis provides evidence of putative CRS and germline variation associations in breast  
305 tumors across race, motivating larger diverse cohorts for genetic epidemiology studies of breast cancer.  
306 Future studies should consider subtype-specific TWAS (i.e., stratification by subtype in predictive model  
307 training and association analyses) to elucidate heritable gene expression effects on breast cancer  
308 outcomes both across and within subtype, which may yield further hypotheses for more fine-tuned clinical  
309 intervention.

310

311 **FUNDING**

312 This work was supported by Susan G. Komen® for the Cure for CBCS study infrastructure.  
313 Funding was provided by the National Institutes of Health, National Cancer Institute P01-CA151135, P50-  
314 CA05822, and U01-CA179715 to AFO, CMP, and MAT. AP is supported by T32ES007018. MIL is  
315 supported by R01-HG009937, R01-MH118349, P01-CA142538, and P30-ES010126. The Translational  
316 Genomics Laboratory is supported in part by grants from the National Cancer Institute (3P30CA016086)  
317 and the University of North Carolina at Chapel Hill University Cancer Research Fund. Genotyping was  
318 done at the DCEG Cancer Genomics Research Laboratory using funds from the NCI Intramural Research  
319 Program.

320 Funding for BCAC and iCOGS came from: Cancer Research UK [grant numbers C1287/A16563,  
321 C1287/A10118, C1287/A10710, C12292/A11174, C1281/A12014, C5047/A8384, C5047/A15007,  
322 C5047/A10692, C8197/A16565], the European Union's Horizon 2020 Research and Innovation  
323 Programme (grant numbers 634935 and 633784 for BRIDGES and B-CAST respectively), the European  
324 Community's Seventh Framework Programme under grant agreement n° 223175 [HEALTHF2-2009-  
325 223175] (COGS), the National Institutes of Health [CA128978] and Post-Cancer GWAS initiative [1U19  
326 CA148537, 1U19 CA148065-01 (DRIVE) and 1U19 CA148112 - the GAME-ON initiative], the Department  
327 of Defence [W81XWH-10-1-0341], and the Canadian Institutes of Health Research CIHR) for the CIHR  
328 Team in Familial Risks of Breast Cancer [grant PSR-SIIRI-701]. All studies and funders as listed in  
329 Michailidou K *et al* (2013 and 2015) and in Guo Q *et al* (2015) are acknowledged for their contributions.

330  
331 **NOTES**

332 *Affiliations of authors:* Department of Epidemiology, Gillings School of Global Public Health (AP, AFO,  
333 MAT), Department of Biostatistics (MIL), Department of Genetics (MIL, CMP), Department of Pathology  
334 and Laboratory Medicine (MAT, CMP), Lineberger Comprehensive Cancer Center (AFO, CMP),  
335 University of North Carolina at Chapel Hill; Department of Pathology and Laboratory Medicine, David  
336 Geffen School of Medicine, University of California, Los Angeles (AB); Division of Cancer Epidemiology  
337 and Genetics, National Cancer Institute (MG); Division of Genetics and Epidemiology, Institute of Cancer  
338 Research (MG)

339

340 *Prior presentation:* This work has been presented in poster sessions at the 2020 American Association for  
341 Cancer Research: The Science of Cancer Health Disparities and the 2020 Harvard Population  
342 Quantitative Genetics conferences.

343

344 *Disclaimers:* CMP is an equity stock holder, consultant, and board of directors member of BioClassifier  
345 LLC and GeneCentric Diagnostics. CMP is also listed as an inventor on patent applications on the Breast  
346 PAM50 assay.

347

348 *Role of the funder:* This content is solely the responsibility of the authors and does not necessarily  
349 represent the official views of the National Institutes of Health. The funder had no role in study design,  
350 data collection, analysis or interpretation, or writing of the manuscript.

351

352 *Acknowledgements:* We thank the Carolina Breast Cancer Study participants and volunteers. We also  
353 thank Colin Begg, Jianwen Cai, Katherine Hoadley, Yun Li, and Bogdan Pasaniuc for valuable discussion  
354 during the research process. We thank Erin Kirk and Jessica Tse for their invaluable support during the  
355 research process. We thank the DCEG Cancer Genomics Research Laboratory and acknowledge the  
356 support from Stephen Chanock, Rose Yang, Meredith Yeager, Belynda Hicks, and Bin Zhu. We also  
357 acknowledge the iCOGs Consortium for their publicly available GWAS summary statistics.

358

## 359 **AVAILABILITY OF DATA AND MATERIALS**

360 Expression data from CBCS is available on NCBI GEO with accession number GSE148426.  
361 CBCS genotype datasets analyzed in this study are not publicly available as many CBCS patients are still  
362 being followed and accordingly CBCS data is considered sensitive; the data is available from M.A.T upon  
363 reasonable request. Supplementary Data includes summary statistics for eQTL results, tumor expression  
364 models, and relevant R code for training expression models in CBCS and are freely available  
365 at [https://github.com/bhattacharya-a-bt/CBCS\\_TWAS\\_Paper/](https://github.com/bhattacharya-a-bt/CBCS_TWAS_Paper/). iCOGs summary statistics are available  
366 online at <http://bcac.ccge.medschl.cam.ac.uk/bcacdata/icogs-complete-summary-results>.

367 **REFERENCES**

- 368 1. Parker JS, Mullins M, Cheang MC, *et al.* Supervised risk predictor of breast cancer based on  
369 intrinsic subtypes. *J Clin Oncol* 2009;27(8):1160-7.
- 370 2. Wallden B, Storhoff J, Nielsen T, *et al.* Development and verification of the PAM50-based  
371 Prosigna breast cancer gene signature assay. *BMC Med Genomics* 2015;8:54.
- 372 3. Paik S, Shak S, Tang G, *et al.* A multigene assay to predict recurrence of tamoxifen-treated,  
373 node-negative breast cancer. *N Engl J Med* 2004;351(27):2817-26.
- 374 4. Geiss GK, Bumgarner RE, Birditt B, *et al.* Direct multiplexed measurement of gene expression  
375 with color-coded probe pairs. *Nat Biotechnol* 2008;26(3):317-25.
- 376 5. Harris LN, Ismaila N, McShane LM, *et al.* Use of Biomarkers to Guide Decisions on Adjuvant  
377 Systemic Therapy for Women With Early-Stage Invasive Breast Cancer: American Society of Clinical  
378 Oncology Clinical Practice Guideline. *Journal of Clinical Oncology* 2016;34(10):1134-1150.
- 379 6. Coates AS, Winer EP, Goldhirsch A, *et al.* Tailoring therapies--improving the management of  
380 early breast cancer: St Gallen International Expert Consensus on the Primary Therapy of Early Breast  
381 Cancer 2015. *Ann Oncol* 2015;26(8):1533-46.
- 382 7. Dowsett M, Sestak I, Lopez-Knowles E, *et al.* Comparison of PAM50 Risk of Recurrence Score  
383 With Oncotype DX and IHC4 for Predicting Risk of Distant Recurrence After Endocrine Therapy. *Journal*  
384 *of Clinical Oncology* 2013;31(22):2783-2790.
- 385 8. Sestak I, Buus R, Cuzick J, *et al.* Comparison of the Performance of 6 Prognostic Signatures for  
386 Estrogen Receptor-Positive Breast Cancer: A Secondary Analysis of a Randomized Clinical Trial. *JAMA*  
387 *Oncol* 2018;4(4):545-553.
- 388 9. Troester MA, Sun X, Allott EH, *et al.* Racial Differences in PAM50 Subtypes in the Carolina  
389 Breast Cancer Study. *J Natl Cancer Inst* 2018;110(2):176-82.
- 390 10. Albain KS, Gray RJ, Makower DF, *et al.* Race, ethnicity and clinical outcomes in hormone  
391 receptor-positive, HER2-negative, node-negative breast cancer in the randomized TAILORx trial. *J Natl*  
392 *Cancer Inst* 2020; 10.1093/jnci/djaa148.
- 393 11. Reeder-Hayes KE, Anderson BO. Breast Cancer Disparities at Home and Abroad: A Review of  
394 the Challenges and Opportunities for System-Level Change. *Clin Cancer Res* 2017;23(11):2655-2664.



- 395 12. Durham DD, Robinson WR, Lee SS, *et al.* Insurance-Based Differences in Time to Diagnostic  
396 Follow-up after Positive Screening Mammography. *Cancer Epidemiol Biomarkers Prev* 2016;25(11):1474-  
397 1482.
- 398 13. Wheeler SB, Reeder-Hayes KE, Carey LA. Disparities in breast cancer treatment and outcomes:  
399 biological, social, and health system determinants and opportunities for research. *Oncologist*  
400 2013;18(9):986-93.
- 401 14. Ko NY, Hong S, Winn RA, *et al.* Association of Insurance Status and Racial Disparities With the  
402 Detection of Early-Stage Breast Cancer. *JAMA Oncology* 2020;6(3):385-392.
- 403 15. Huo D, Hu H, Rhie SK, *et al.* Comparison of Breast Cancer Molecular Features and Survival by  
404 African and European Ancestry in The Cancer Genome Atlas. *JAMA Oncol* 2017;3(12):1654-1662.
- 405 16. Bhattacharya A, García-Closas M, Olshan AF, *et al.* A framework for transcriptome-wide  
406 association studies in breast cancer in diverse study populations. *Genome Biol* 2020;21(1):42.
- 407 17. Gamazon ER, Wheeler HE, Shah KP, *et al.* A gene-based association method for mapping traits  
408 using reference transcriptome data. *Nat Genet* 2015;47(9):1091-8.
- 409 18. Gusev A, Ko A, Shi H, *et al.* Integrative approaches for large-scale transcriptome-wide  
410 association studies. *Nat Genet* 2016;48(3):245-52.
- 411 19. Zhong J, Jermusyk A, Wu L, *et al.* A Transcriptome-Wide Association Study Identifies Novel  
412 Candidate Susceptibility Genes for Pancreatic Cancer. *J Natl Cancer Inst* 2020;112(10):1003-1012.
- 413 20. Wu L, Shi W, Long J, *et al.* A transcriptome-wide association study of 229,000 women identifies  
414 new candidate susceptibility genes for breast cancer. *Nat Genet* 2018;50(7):968-978.
- 415 21. Mancuso N, Gayther S, Gusev A, *et al.* Large-scale transcriptome-wide association study  
416 identifies new prostate cancer risk regions. *Nat Commun* 2018;9(1):4079.
- 417 22. Keys KL, Mak ACY, White MJ, *et al.* On the cross-population generalizability of gene expression  
418 prediction models. *PLoS Genet* 2020;16(8):e1008927.
- 419 23. Hair BY, Hayes S, Tse CK, *et al.* Racial differences in physical activity among breast cancer  
420 survivors: implications for breast cancer care. *Cancer* 2014;120(14):2174-82.
- 421 24. Newman B, Moorman PG, Millikan R, *et al.* The Carolina Breast Cancer Study: integrating  
422 population-based epidemiology and molecular biology. *Breast Cancer Res Treat* 1995;35(1):51-60.



- 423 25. Amos CI, Dennis J, Wang Z, *et al.* The OncoArray Consortium: A Network for Understanding the  
424 Genetic Architecture of Common Cancers. *Cancer Epidemiol Biomarkers Prev* 2017;26(1):126-135.
- 425 26. Auton A, Brooks LD, Durbin RM, *et al.* A global reference for human genetic variation. *Nature*  
426 2015;526(7571):68-74.
- 427 27. O'Connell J, Gurdasani D, Delaneau O, *et al.* A general approach for haplotype phasing across  
428 the full spectrum of relatedness. *PLoS Genet* 2014;10(4):e1004234.
- 429 28. Delaneau O, Marchini J, Zagury JF. A linear complexity phasing method for thousands of  
430 genomes. *Nat Methods* 2011;9(2):179-81.
- 431 29. Howie BN, Donnelly P, Marchini J. A flexible and accurate genotype imputation method for the  
432 next generation of genome-wide association studies. *PLoS Genet* 2009;5(6):e1000529.
- 433 30. Wigginton JE, Cutler DJ, Abecasis GR. A note on exact tests of Hardy-Weinberg equilibrium. *Am*  
434 *J Hum Genet* 2005;76(5):887-93.
- 435 31. Purcell S, Neale B, Todd-Brown K, *et al.* PLINK: a tool set for whole-genome association and  
436 population-based linkage analyses. *Am J Hum Genet* 2007;81(3):559-75.
- 437 32. Sherry ST, Ward MH, Kholodov M, *et al.* dbSNP: the NCBI database of genetic variation. *Nucleic*  
438 *Acids Res* 2001;29(1):308-11.
- 439 33. Bhattacharya A, Hamilton AM, Furberg H, *et al.* An approach for normalization and quality control  
440 for NanoString RNA expression data. *Brief Bioinform* 2020; 10.1093/bib/bbaa163.
- 441 34. Anders S, Huber W. Differential expression analysis for sequence count data. *Genome Biol*  
442 2010;11(10):R106.
- 443 35. Love MI, Huber W, Anders S. Moderated estimation of fold change and dispersion for RNA-seq  
444 data with DESeq2. *Genome Biol* 2014;15(12):550.
- 445 36. Ding B, Cao C, Li Q, *et al.* Power analysis of transcriptome-wide association study. *bioRxiv* 2020;  
446 10.1101/2020.07.19.211151:2020.07.19.211151.
- 447 37. van Iterson M, van Zwet EW, Heijmans BT. Controlling bias and inflation in epigenome- and  
448 transcriptome-wide association studies using the empirical null distribution. *Genome Biol* 2017;18(1):19.

- 449 38. Benjamini Y, Hochberg Y. Controlling the False Discovery Rate: A Practical and Powerful  
450 Approach to Multiple Testing. *Journal of the Royal Statistical Society. Series B (Methodological)*  
451 1995;57(1):289-300.
- 452 39. Wheeler HE, Ploch S, Barbeira AN, *et al.* Imputed gene associations identify replicable trans-  
453 acting genes enriched in transcription pathways and complex traits. *Genetic Epidemiology*  
454 2019;43(6):596-608.
- 455 40. Liu X, Mefford JA, Dahl A, *et al.* GBAT: a gene-based association test for robust detection of  
456 trans-gene regulation. *Genome Biology* 2020;21(1):211.
- 457 41. Urbut SM, Wang G, Carbonetto P, *et al.* Flexible statistical methods for estimating and testing  
458 effects in genomic studies with multiple conditions. *Nat Genet* 2019;51(1):187-195.
- 459 42. Gravel S. Population genetics models of local ancestry. *Genetics* 2012;191(2):607-19.
- 460 43. Nelson D, Kelleher J, Ragsdale AP, *et al.* Accounting for long-range correlations in genome-wide  
461 simulations of large cohorts. *PLoS Genet* 2020;16(5):e1008619.
- 462 44. Shang L, Smith JA, Zhao W, *et al.* Genetic Architecture of Gene Expression in European and  
463 African Americans: An eQTL Mapping Study in GENOA. *Am J Hum Genet* 2020;106(4):496-512.
- 464 45. Wang S, Dorsey TH, Terunuma A, *et al.* Relationship between tumor DNA methylation status and  
465 patient characteristics in African-American and European-American women with breast cancer. *PLoS*  
466 *One* 2012;7(5):e37928.
- 467 46. Conway K, Edmiston SN, Tse CK, *et al.* Racial variation in breast tumor promoter methylation in  
468 the Carolina Breast Cancer Study. *Cancer Epidemiol Biomarkers Prev* 2015;24(6):921-30.
- 469 47. Chen Y, Sadasivan SM, She R, *et al.* Breast and prostate cancers harbor common somatic copy  
470 number alterations that consistently differ by race and are associated with survival. *BMC Med Genomics*  
471 2020;13(1):116.
- 472 48. Parada H, Jr., Sun X, Fleming JM, *et al.* Race-associated biological differences among luminal A  
473 and basal-like breast cancers in the Carolina Breast Cancer Study. *Breast Cancer Res* 2017;19(1):131.
- 474 49. Prat A, Adamo B, Cheang MC, *et al.* Molecular characterization of basal-like and non-basal-like  
475 triple-negative breast cancer. *Oncologist* 2013;18(2):123-33.

- 476 50. Zhang C, Han Y, Huang H, *et al.* Integrated analysis of expression profiling data identifies three  
477 genes in correlation with poor prognosis of triple-negative breast cancer. *Int J Oncol* 2014;44(6):2025-33.
- 478 51. Mahadevappa R, Neves H, Yuen SM, *et al.* DNA Replication Licensing Protein MCM10 Promotes  
479 Tumor Progression and Is a Novel Prognostic Biomarker and Potential Therapeutic Target in Breast  
480 Cancer. *Cancers (Basel)* 2018;10(9).
- 481 52. Hagemann IS. Molecular Testing in Breast Cancer: A Guide to Current Practices. *Arch Pathol*  
482 *Lab Med* 2016;140(8):815-24.
- 483 53. Yao Z, Zheng X, Lu S, *et al.* Knockdown of FAM64A suppresses proliferation and migration of  
484 breast cancer cells. *Breast Cancer* 2019;26(6):835-845.
- 485 54. Gong D, Ferrell JE, Jr. The roles of cyclin A2, B1, and B2 in early and late mitotic events. *Mol Biol*  
486 *Cell* 2010;21(18):3149-61.
- 487 55. Thakkar AD, Raj H, Chakrabarti D, *et al.* Identification of gene expression signature in estrogen  
488 receptor positive breast carcinoma. *Biomark Cancer* 2010;2:1-15.
- 489 56. Aguilar H, Urruticoechea A, Halonen P, *et al.* VAV3 mediates resistance to breast cancer  
490 endocrine therapy. *Breast Cancer Res* 2014;16(3):R53.
- 491 57. Zeng L, Sachdev P, Yan L, *et al.* Vav3 mediates receptor protein tyrosine kinase signaling,  
492 regulates GTPase activity, modulates cell morphology, and induces cell transformation. *Mol Cell Biol*  
493 2000;20(24):9212-24.
- 494 58. Rosenblatt AE, Garcia MI, Lyons L, *et al.* Inhibition of the Rho GTPase, Rac1, decreases  
495 estrogen receptor levels and is a novel therapeutic strategy in breast cancer. *Endocr Relat Cancer*  
496 2011;18(2):207-19.
- 497 59. Xu Z-S, Zhang H-X, Li W-W, *et al.* FAM64A positively regulates STAT3 activity to promote Th17  
498 differentiation and colitis-associated carcinogenesis. *Proceedings of the National Academy of Sciences*  
499 2019;116(21):10447-10452.
- 500 60. Jiang H, Wang L, Wang F, *et al.* Proprotein convertase subtilisin/kexin type 6 promotes in vitro  
501 proliferation, migration and inflammatory cytokine secretion of synovial fibroblast-like cells from  
502 rheumatoid arthritis via nuclear  $\kappa$ B, signal transducer and activator of transcription 3 and extracellular  
503 signal regulated 1/2 pathways. *Mol Med Rep* 2017;16(6):8477-8484.

- 504 61. Wang QM, Lv L, Tang Y, *et al.* MMP-1 is overexpressed in triple-negative breast cancer tissues  
505 and the knockdown of MMP-1 expression inhibits tumor cell malignant behaviors in vitro. *Oncol Lett*  
506 2019;17(2):1732-1740.
- 507 62. McGowan PM, Duffy MJ. Matrix metalloproteinase expression and outcome in patients with  
508 breast cancer: analysis of a published database. *Ann Oncol* 2008;19(9):1566-72.
- 509 63. Boström P, Söderström M, Vahlberg T, *et al.* MMP-1 expression has an independent prognostic  
510 value in breast cancer. *BMC Cancer* 2011;11:348.
- 511 64. Acerbi I, Cassereau L, Dean I, *et al.* Human breast cancer invasion and aggression correlates  
512 with ECM stiffening and immune cell infiltration. *Integr Biol (Camb)* 2015;7(10):1120-34.
- 513 65. González LO, Corte MD, Junquera S, *et al.* Expression and prognostic significance of  
514 metalloproteases and their inhibitors in luminal A and basal-like phenotypes of breast carcinoma. *Hum*  
515 *Pathol* 2009;40(9):1224-33.
- 516 66. Xia Y, Fan C, Hoadley KA, *et al.* Genetic determinants of the molecular portraits of epithelial  
517 cancers. *Nat Commun* 2019;10(1):5666.

518

## 519 **FIGURE LEGENDS**

520 **Figure 1.** *Schematic of study analytic approach.* A) In CBCS, constructed race-stratified predictive  
521 models of tumor gene expression from *cis*-SNPs. B) In CBCS, imputed GReX at individual-level using  
522 genotypes and tested for associations between GReX and CRS in race-stratified linear models; only  
523 GReX of genes with significant *cis*- $h^2$  and high cross validation performance ( $R^2 > 0.01$  between observed  
524 and predicted expression) considered for race-stratified association analyses. C) Follow-up analyses on  
525 TWAS-genes (i.e., genes whose GReX were significantly associated with CRS at FDR <0.10). In race-  
526 stratified models, PAM50 SCCs and PAM50 tumor expressions were regressed against TWAS-genes  
527 under a Bayesian multivariate regression and multivariate adaptive shrinkage approach.

528

529 **Figure 2.** *Permutation tests and associations between TWAS-genes and CRS for WW and BW.* A) Effect  
530 estimates correspond to change in ROR-S, Proliferation score, and ROR-P per one standard deviation  
531 increase in TWAS-gene expression (i.e., one standard deviation increase in GReX of gene). Circle

532 denotes a statistically significant association while triangle denotes a non-significant association at  
533 significance threshold of  $p$ -value  $<0.05$ . Blue denotes WW and red denotes BW. B) Histograms  
534 correspond to null distributions of covariates (age at selection, estrogen receptor status, study phase,  
535 tumor stage) residualized- $R^2$  for regressions of CRS on TWAS-genes. Dashed vertical lines correspond to  
536 observed covariates residualized- $R^2$ . Blue denotes WW and red denotes BW.

537

538 **Figure 3.** *Associations between TWAS-genes and PAM50 SCCs.* A) Among WW, associations between  
539 TWAS-genes (genes whose GReX was significantly associated with CRS at FDR  $<0.10$ ) and PAM50  
540 SCCs using Bayesian multivariate regression and multivariate adaptive shrinkage. Effect estimates  
541 correspond to change in subtype centroid correlations (range -1 to 1) for one standard deviation increase  
542 in TWAS-gene expression (i.e., one standard deviation increase in GReX of gene). Circle, triangle, and  
543 square denote corresponding FDR intervals for effect sizes. B) Among BW, associations between TWAS-  
544 genes and PAM50 SCCs using Bayesian multivariate regression and multivariate adaptive shrinkage.  
545 Effect estimates correspond to change in SCCs (range -1 to 1) for one standard deviation increase in  
546 TWAS-gene expression (i.e., one standard deviation increase in GReX of gene). Circle, triangle, and  
547 square denote corresponding FDR intervals for effect sizes.

548

549 **Figure 4.** *Heatmap of associations between TWAS-genes and PAM50 tumor gene expressions using*  
550 *Bayesian multivariate regression and multivariate adaptive shrinkage.* There were 7 TWAS-genes among  
551 WW and 1 TWAS-gene among BW. Effect estimates correspond to change in  $\log_2$  normalized PAM50  
552 tumor expression for one standard deviation increase in TWAS-gene expression (i.e., one standard  
553 deviation increase in GReX of gene). Red denotes positive change in  $\log_2$  normalized tumor expression  
554 and blue denotes negative mean change in  $\log_2$  normalized tumor expression. \*, \*\*, \*\*\* denote FDR  
555 intervals for effect sizes. Assignment of PAM50 gene to subtype was based on PAM50 gene centroid  
556 values for each subtype; the subtype assigned to a PAM50 gene corresponded to the largest positive  
557 centroid value across subtypes for that gene. Importantly, subtype assignment through this “greedy  
558 algorithm” are specific to this study and represent a simplified reality (e.g., ESR1 classified as part of  
559 Luminal A subtype only even though ESR1 expression correlates with both Luminal A and to a slightly

560 lesser degree Luminal B subtype). Moreover, subtype assignment for this portion of analyses was  
561 conducted only for visual comparison of patterns of associations between TWAS-genes and PAM50  
562 tumor gene expressions (i.e., subtype assignment in this portion of analyses had no bearing on  
563 continuous ROR score calculations or subtype-centroid correlations).

### A. Train expression models with CBCS

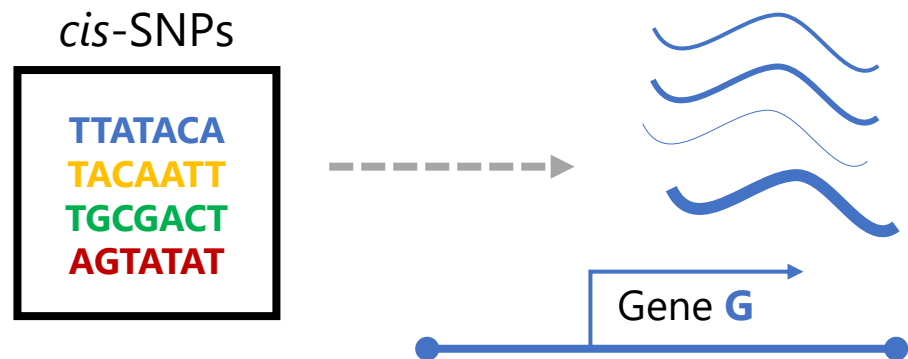

Train race-stratified models of breast tumor expression using FUSION (Gusev *et al* 2016, Nature Genetics)

### B. Perform race-stratified TWAS of ROR scores

Impute GReX (genetically-regulated expression) using individual genotypes from CBCS

Test for associations between GReX and ROR-scores

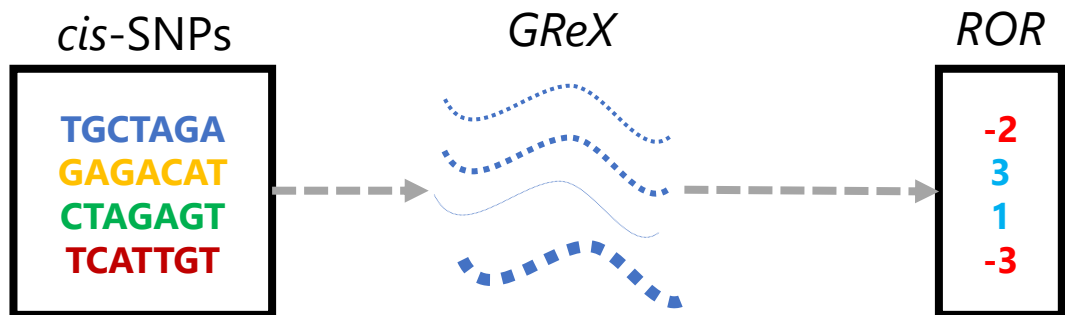

### C. Follow-up on TWAS genes

Bayesian multivariate regression analysis to find associations between GReX and PAM50 gene expression and subtype correlations

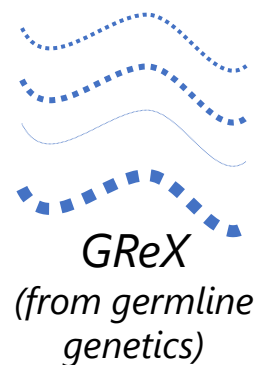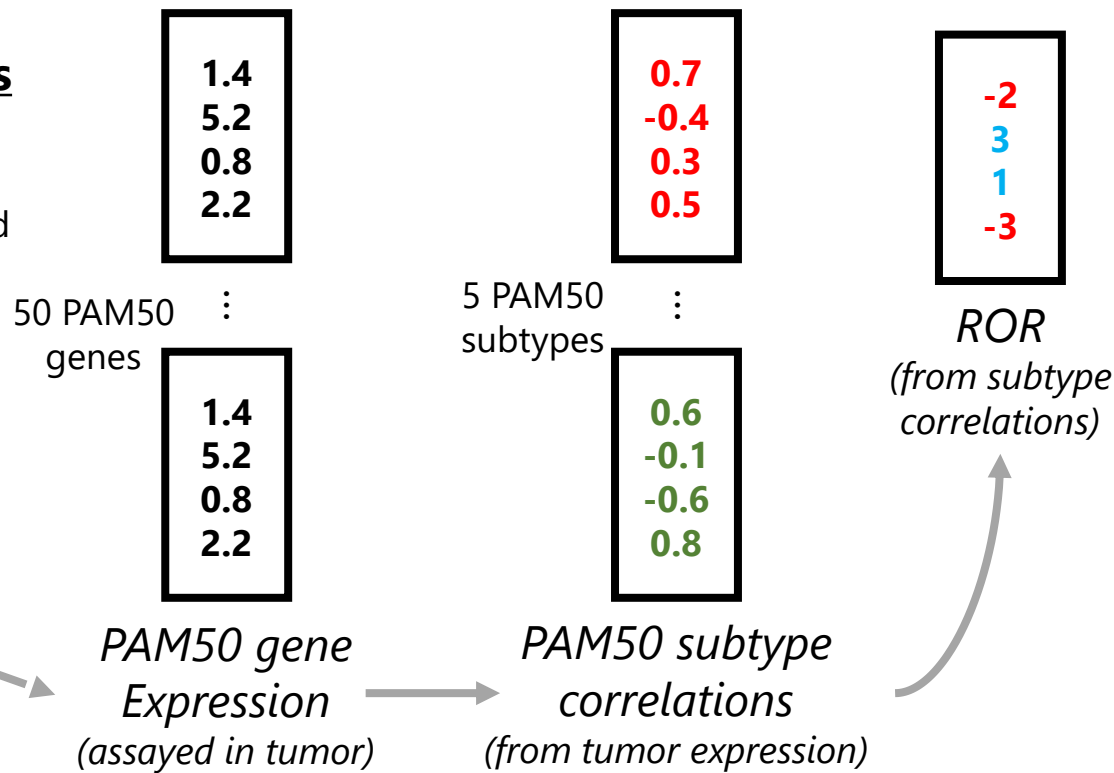

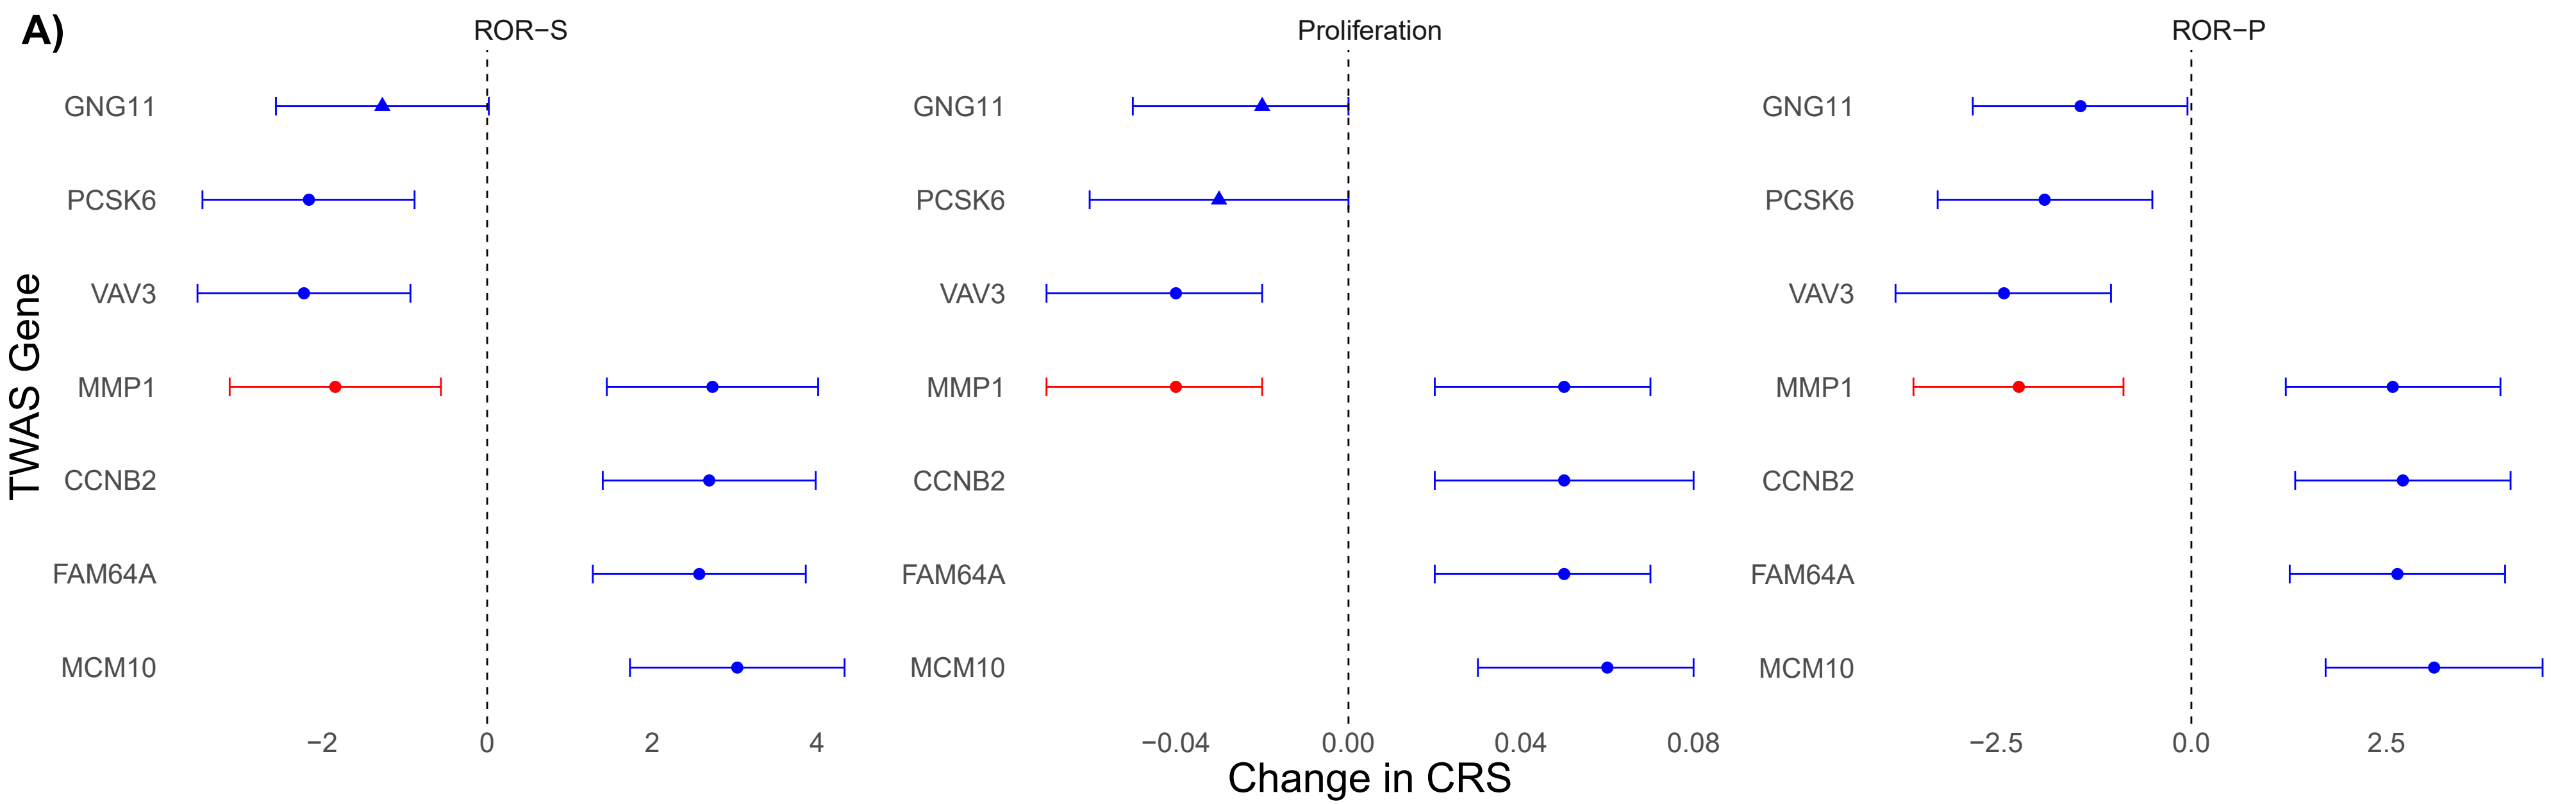

medRxiv preprint doi: <https://doi.org/10.1101/2021.03.19.21253983>; this version posted March 22, 2021. The copyright holder for this preprint (which was not certified by peer review) is the author/funder, who has granted medRxiv a license to display the preprint in perpetuity. It is made available under a [CC-BY 4.0 International license](https://creativecommons.org/licenses/by/4.0/).

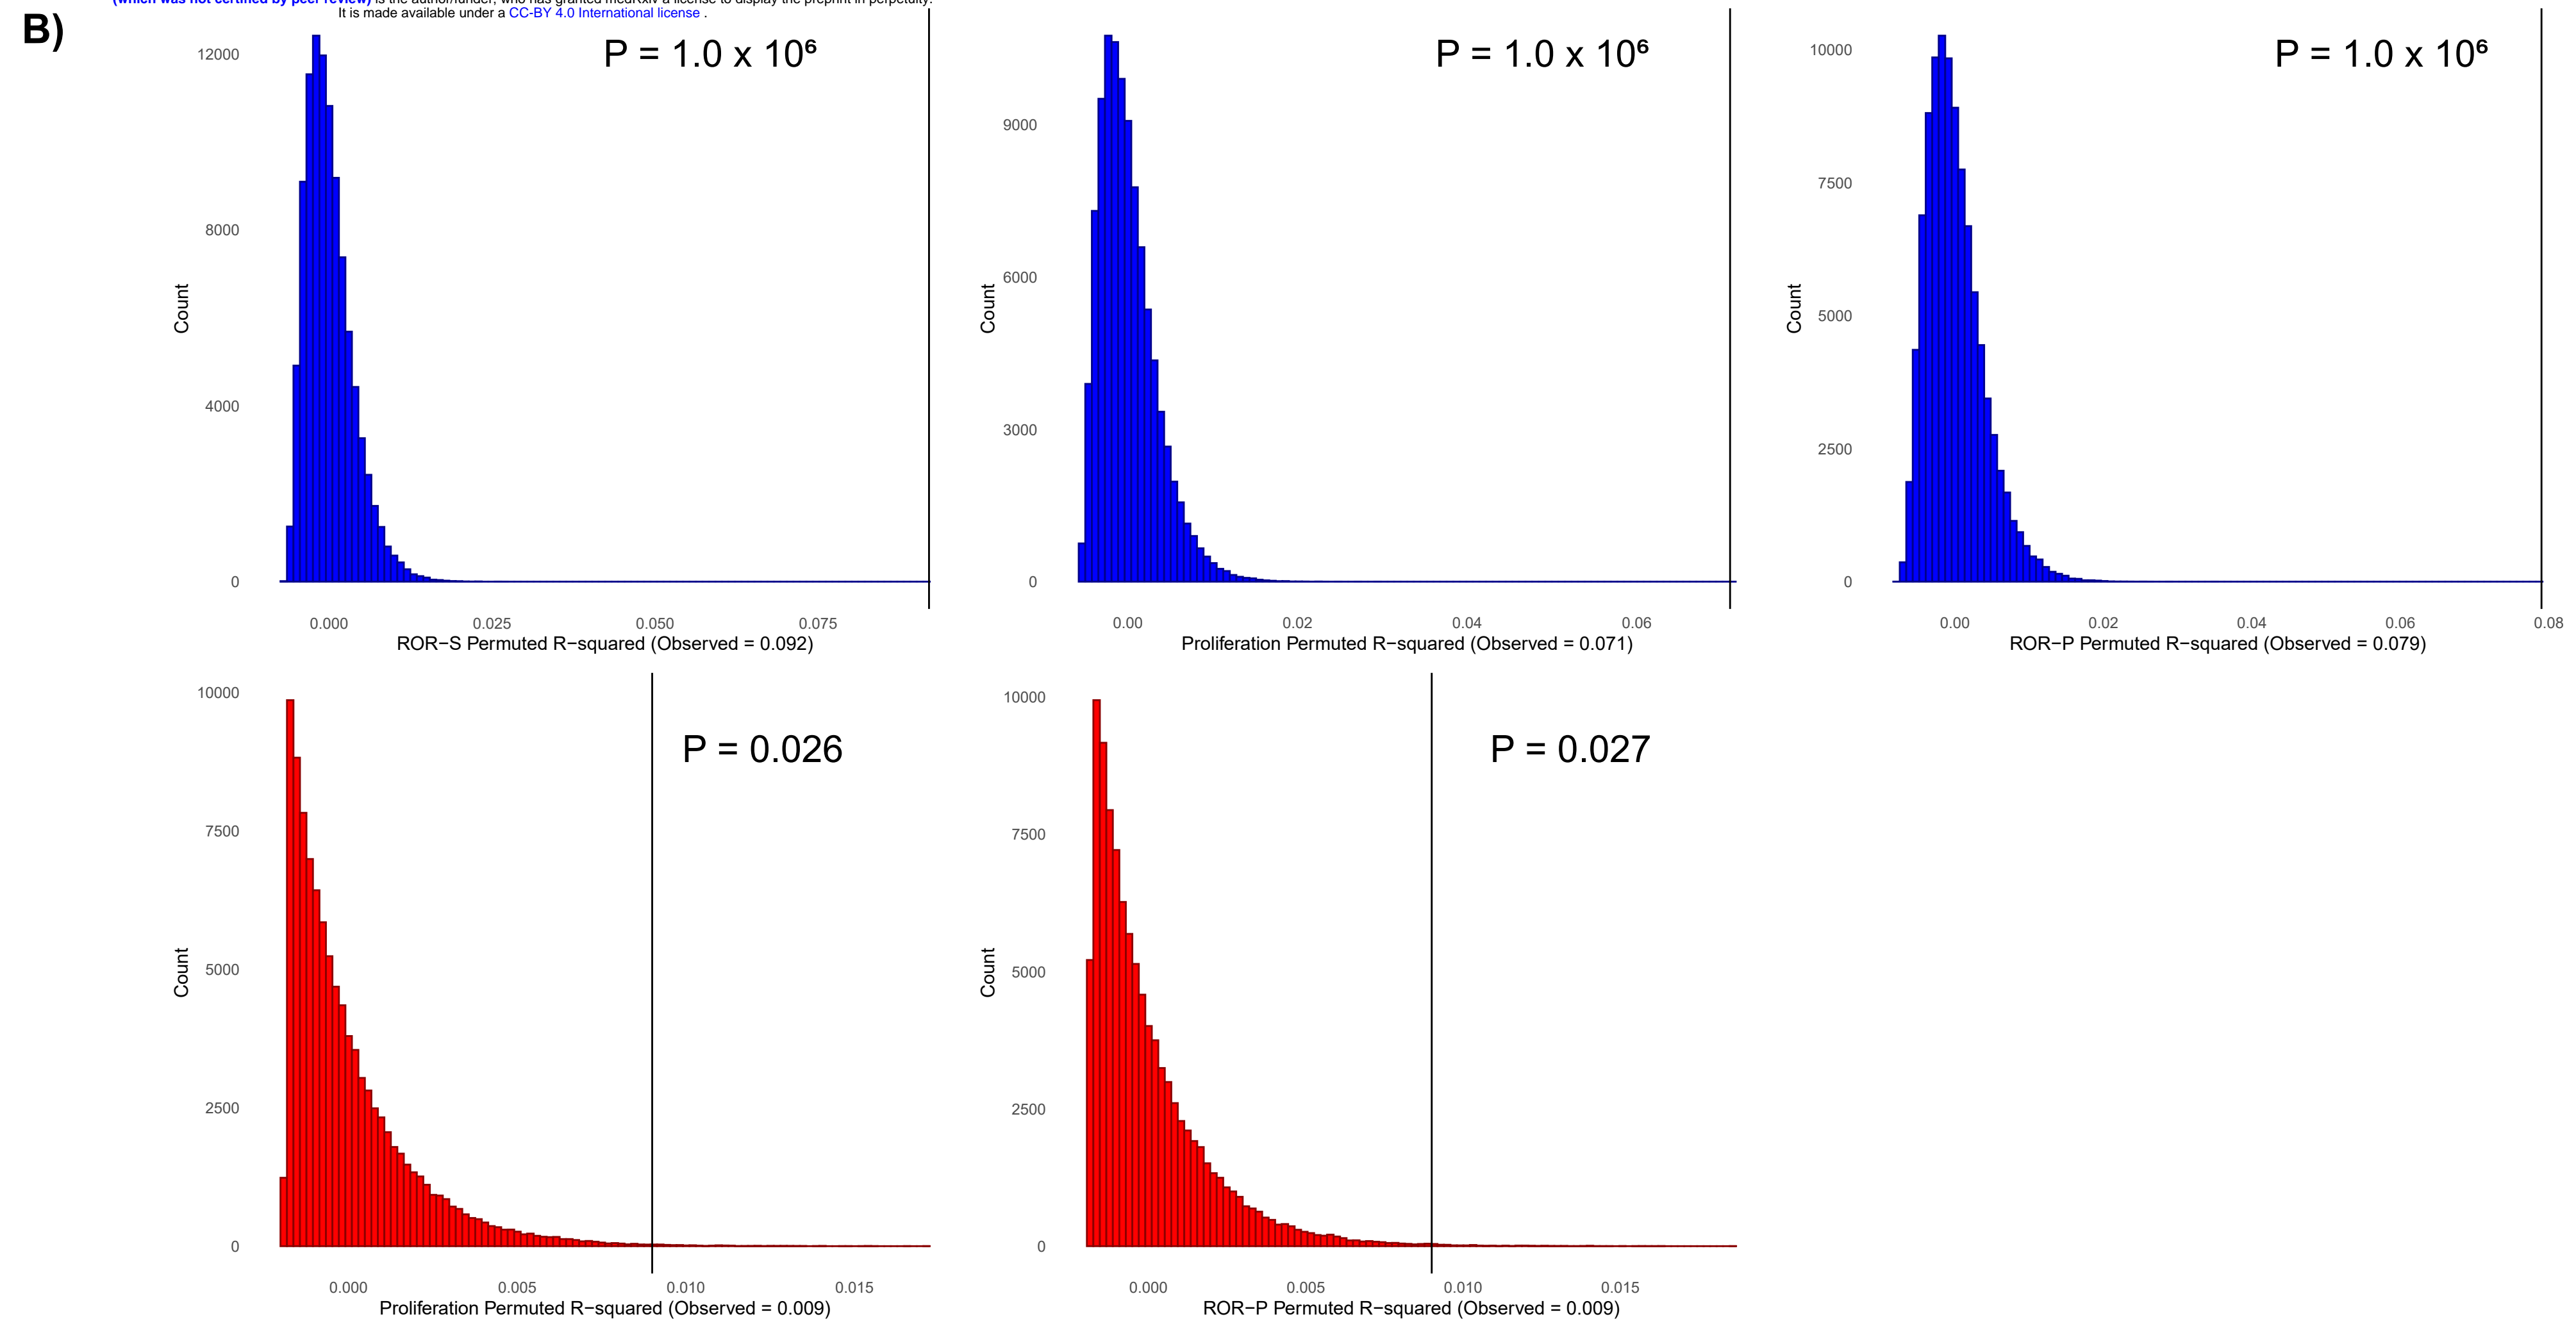



A)

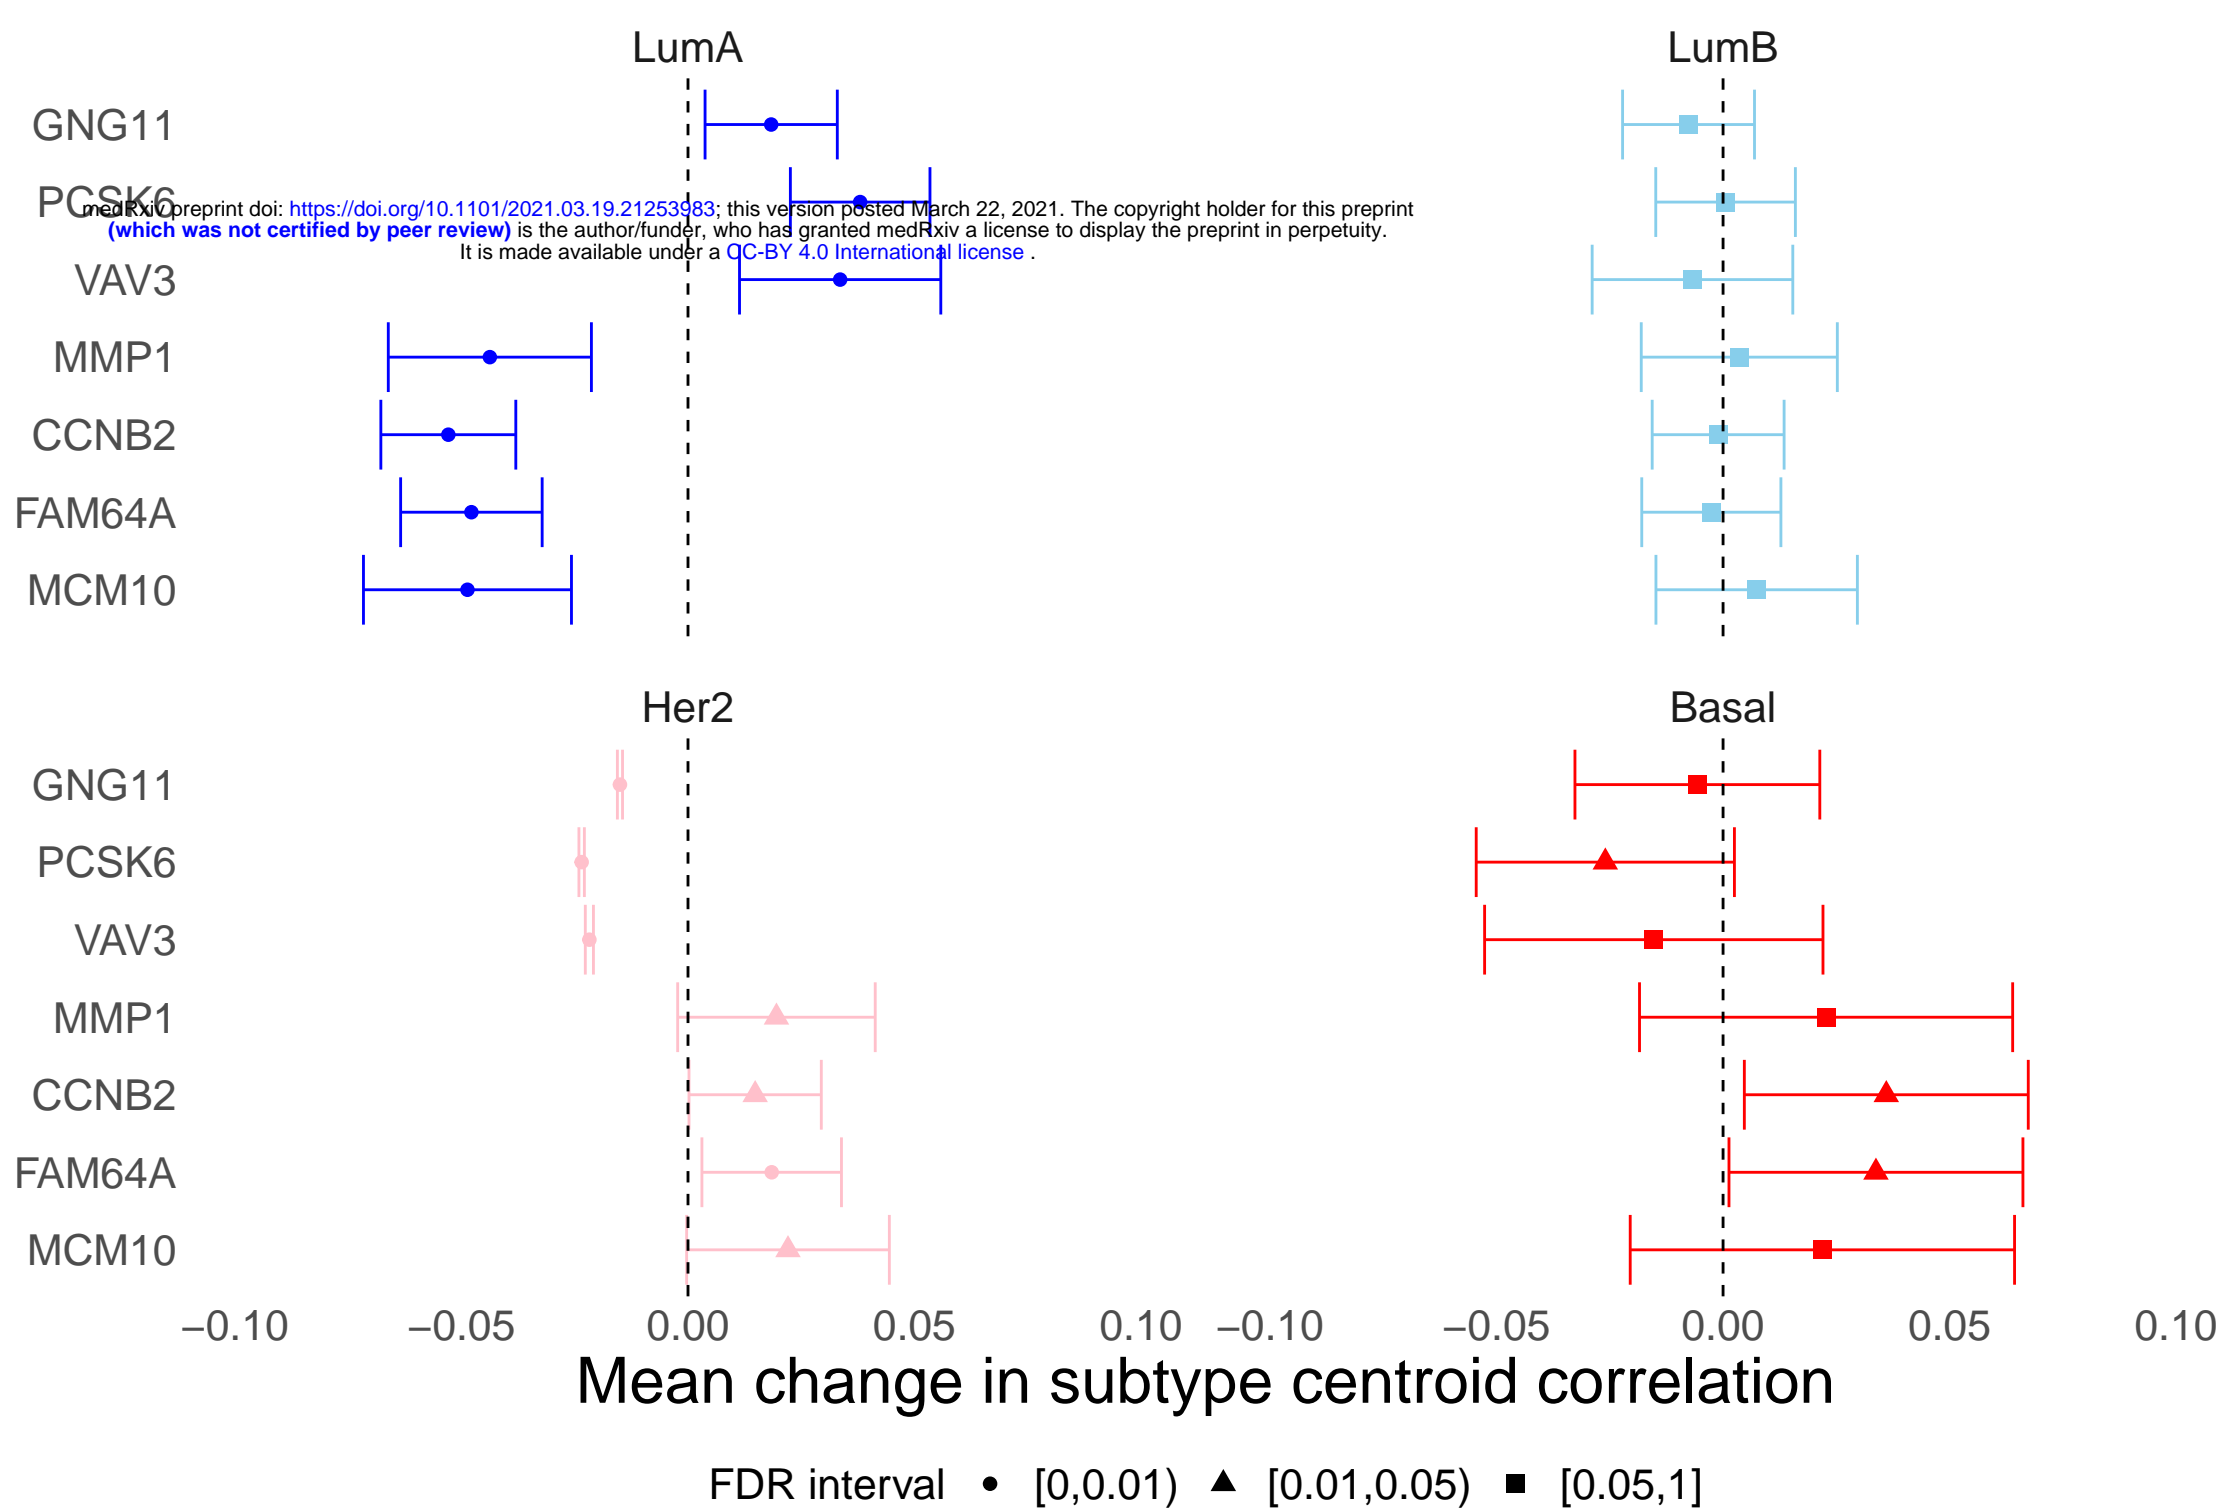

B)

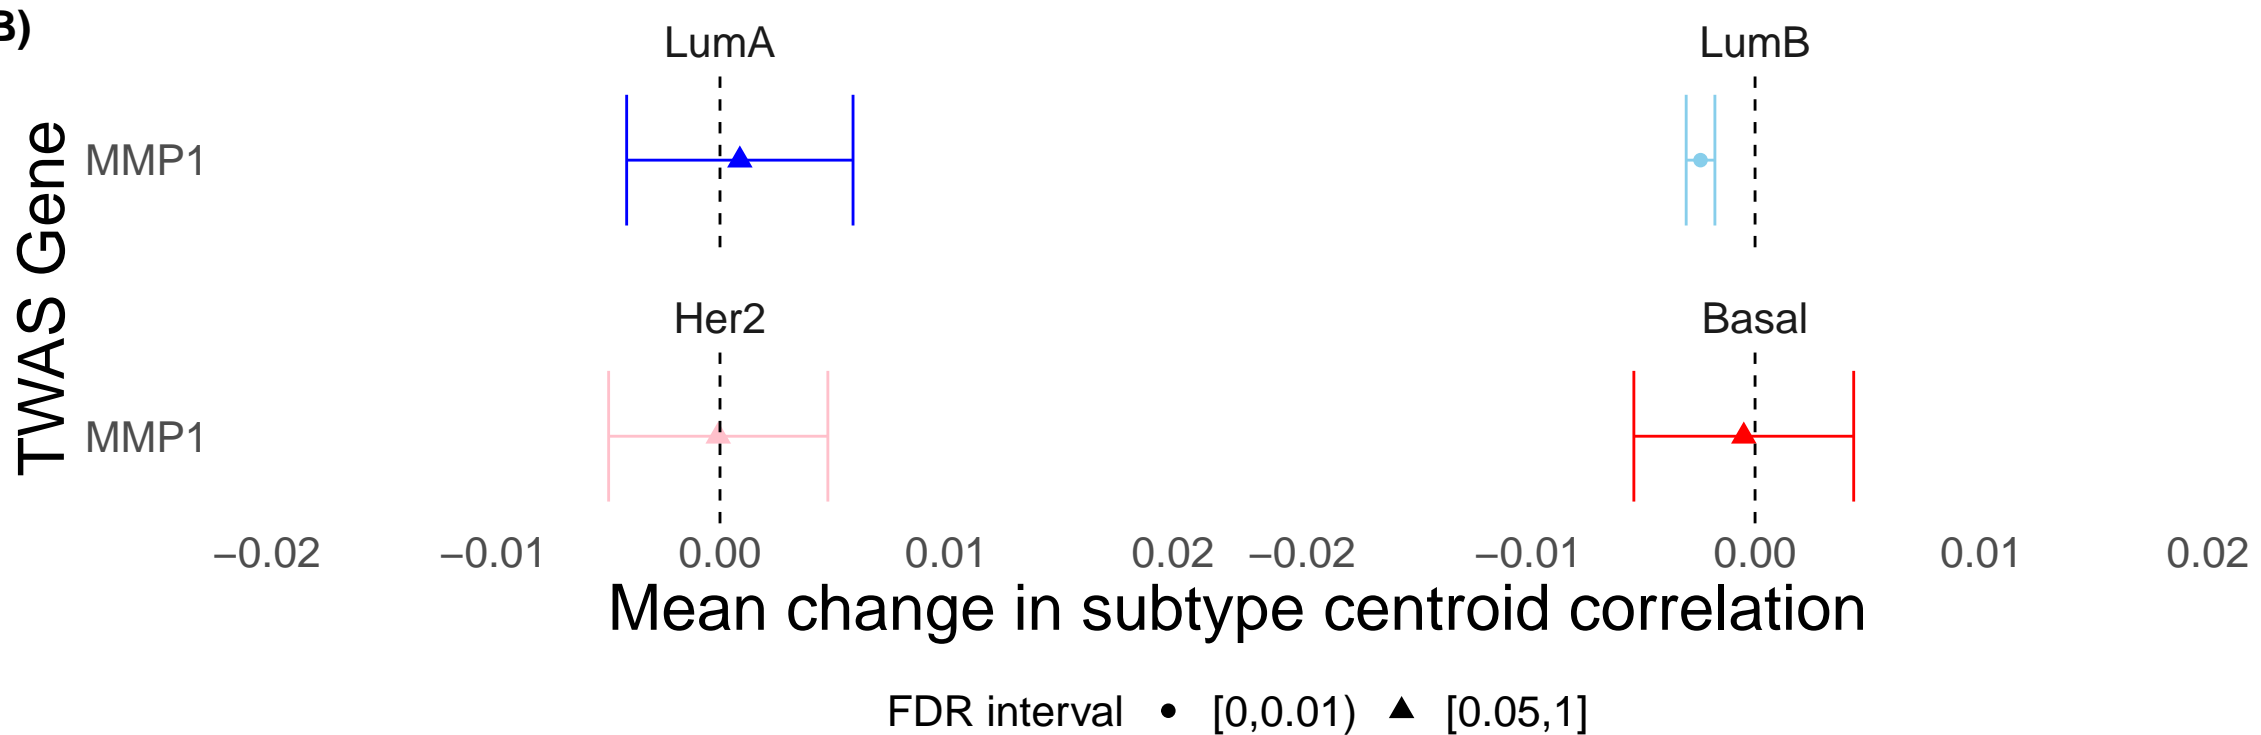

# PAM50 Gene

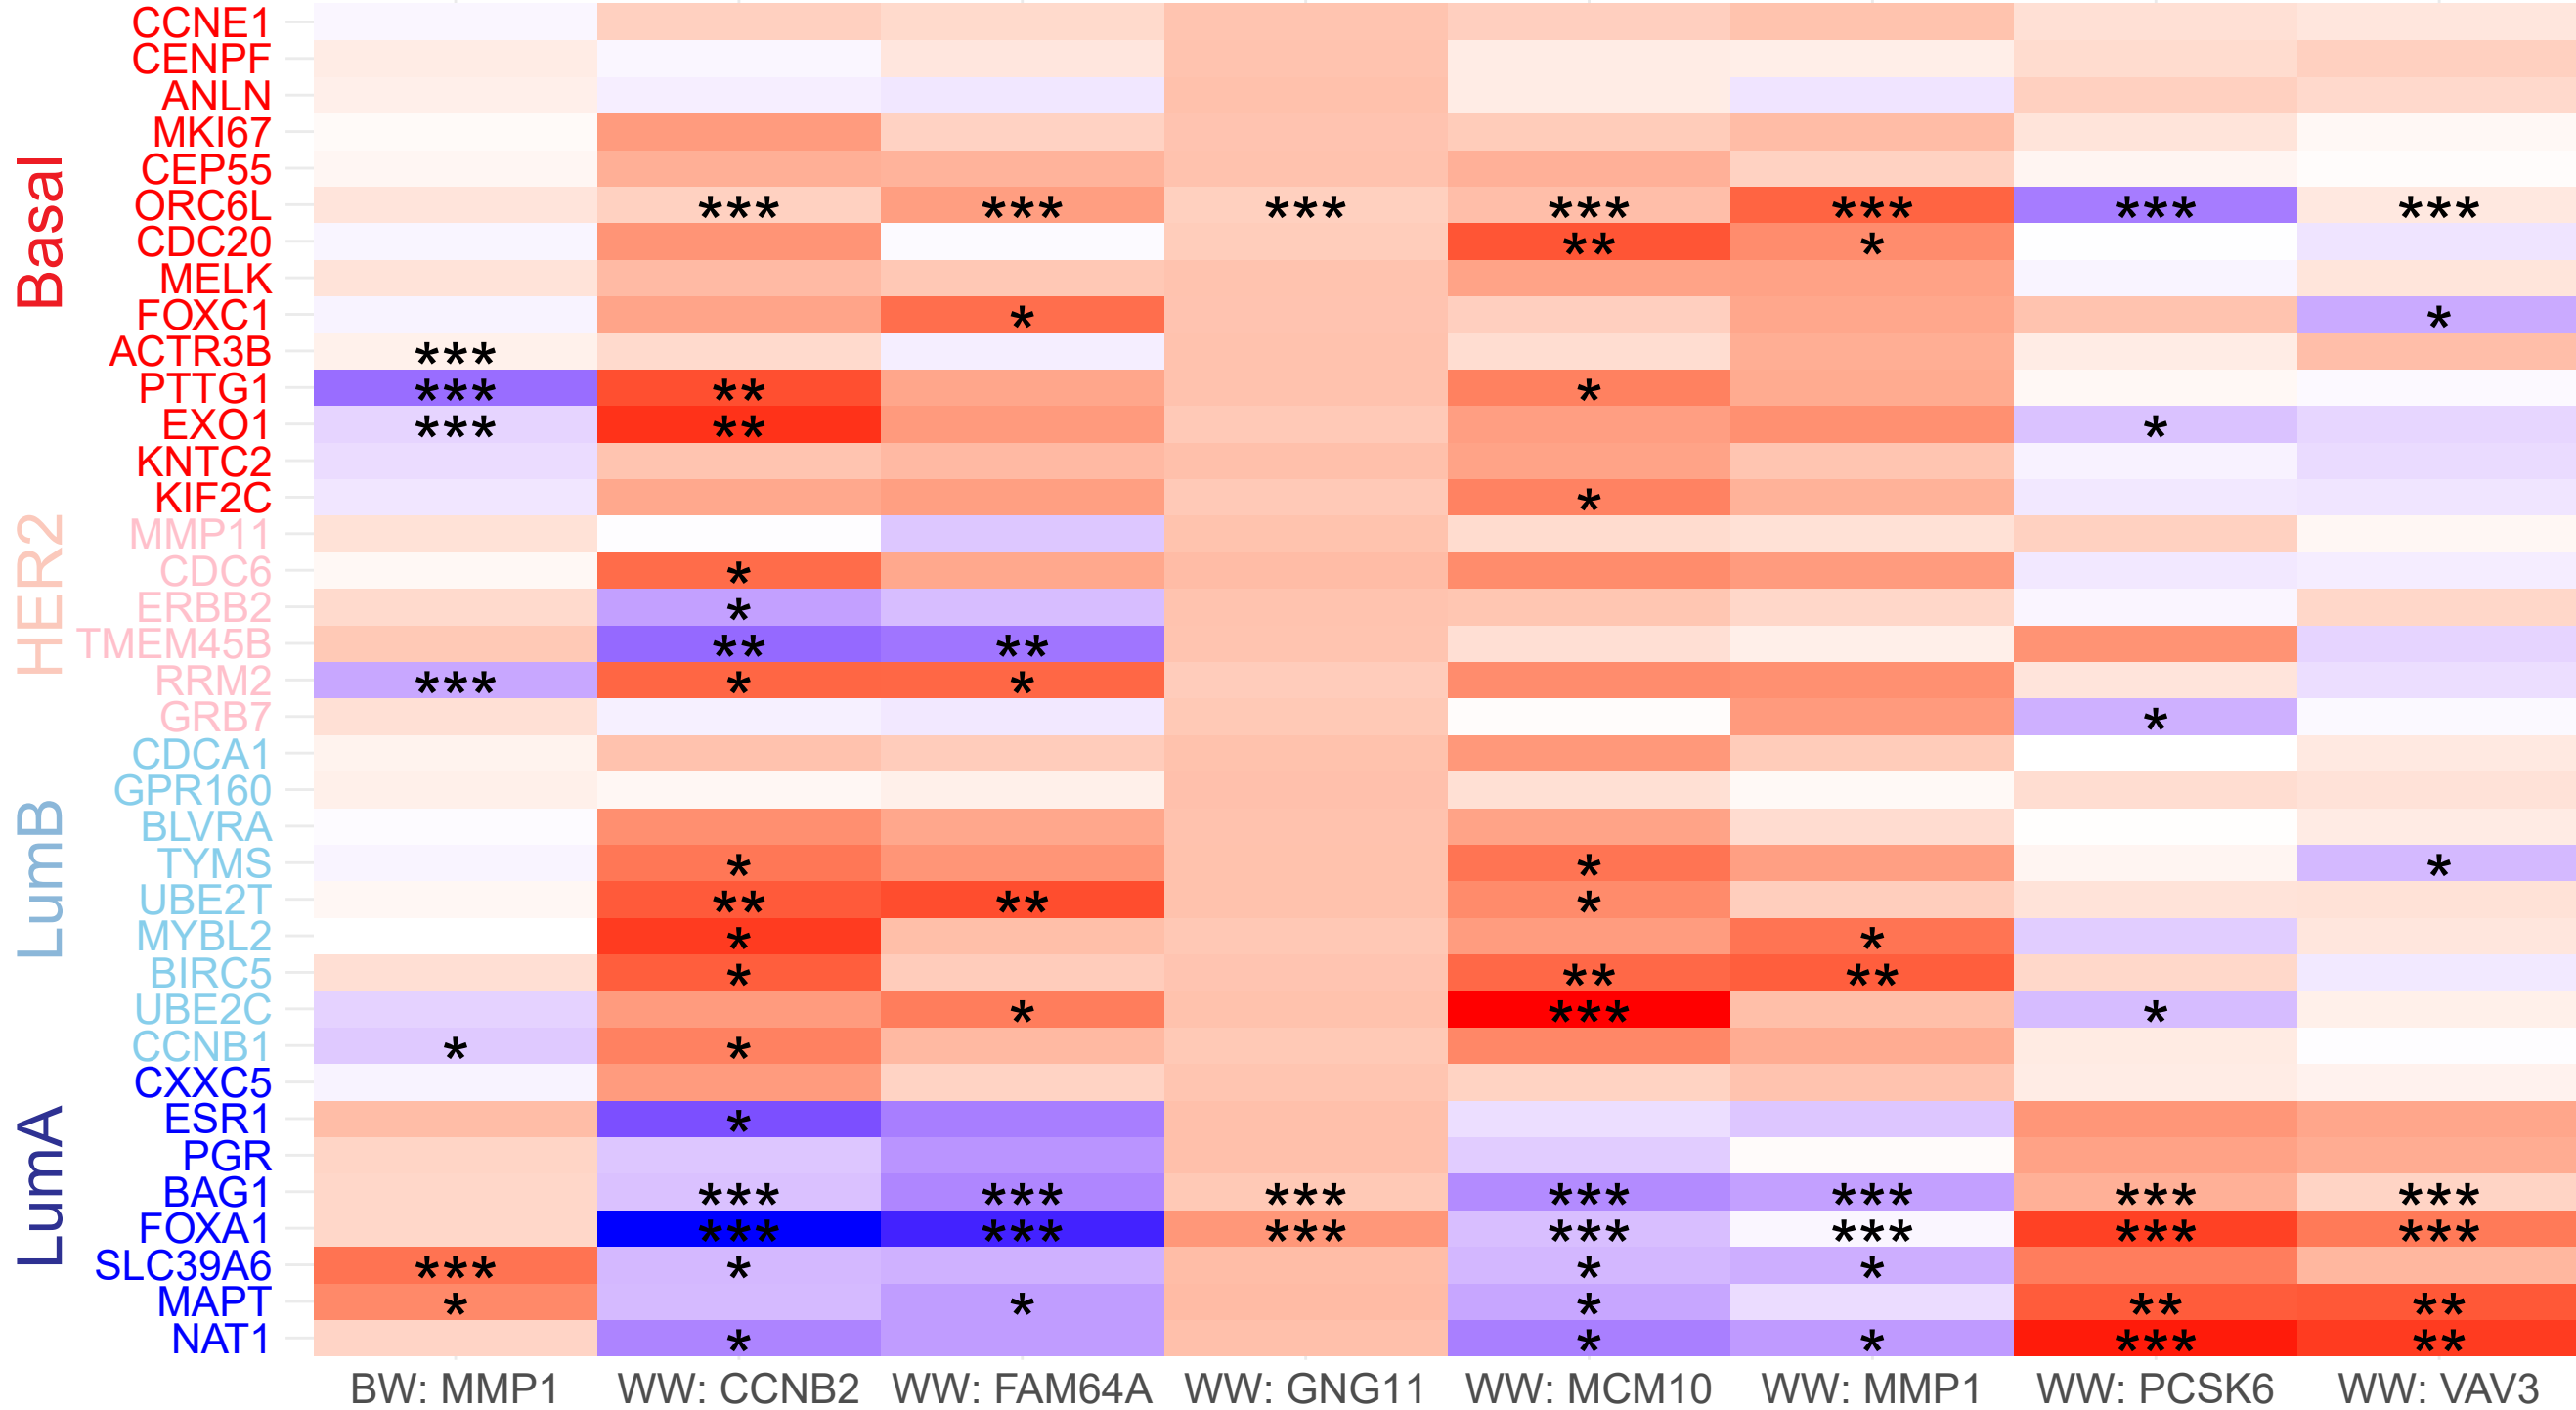

Mean change in normalized PAM50 gene expression

-0.10.0 0.1

FDR Interval

\*\*\* [0,0.001)    \*\* [0.001,0.01)    \* [0.01,0.05)
