1 **Gene-level germline contributions to clinical risk of recurrence scores in Black and White breast**  
2 **cancer patients**

3 Achal Patel, MPH<sup>1</sup>, Montserrat García-Closas, MD, DrPH<sup>2,3</sup>, Andrew F. Olshan, PhD<sup>1,4</sup>, Charles M. Perou,  
4 PhD<sup>4,5,6</sup>, Melissa A. Troester, PhD<sup>1,6</sup>, Michael I. Love, PhD<sup>5,7</sup>, Arjun Bhattacharya, PhD<sup>8,9\*</sup>

5

6 1. Department of Epidemiology, Gillings School of Global Public Health, University of North Carolina-  
7 Chapel Hill, Chapel Hill, NC, USA

8 2. Division of Cancer Epidemiology and Genetics, National Cancer Institute, Bethesda, USA

9 3. Division of Genetics and Epidemiology, Institute of Cancer Research, London, UK

10 4. Lineberger Comprehensive Cancer Center, University of North Carolina-Chapel Hill, Chapel Hill, USA

11 5. Department of Genetics, University of North Carolina-Chapel Hill, Chapel Hill, NC, USA

12 6. Department of Pathology and Laboratory Medicine, University of North Carolina-Chapel Hill, Chapel  
13 Hill, NC, USA

14 7. Department of Biostatistics, Gillings School of Global Public Health, University of North Carolina-  
15 Chapel Hill, Chapel Hill, NC, USA

16 8. Department of Pathology and Laboratory Medicine, David Geffen School of Medicine, University of  
17 California-Los Angeles, Los Angeles, CA, USA

18 9. Institute for Quantitative and Computational Biosciences, David Geffen School of Medicine, University  
19 of California-Los Angeles, Los Angeles, CA, USA

20

21 \*Correspondence can be directed to AB ([abtbhatt@ucla.edu](mailto:abtbhatt@ucla.edu))

22

23 **CONFLICT OF INTEREST STATEMENT**

24 CMP is an equity stock holder, consultant, and board of directors member of BioClassifier LLC and  
25 GeneCentric Diagnostics. CMP is also listed as an inventor on patent applications on the Breast PAM50  
26 assay. The other authors declare no potential conflicts of interest.

## 1 **ABSTRACT**

2 Continuous risk of recurrence scores (CRS) based on tumor gene expression are vital prognostic tools for  
3 breast cancer (BC). Studies have shown that Black women (BW) have higher CRS than White women  
4 (WW). Although systemic injustices contribute substantially to BC disparities, evidence for biological and  
5 germline contributions is emerging. We investigated germline genetic associations with CRS and CRS  
6 disparity using approaches modeled after transcriptome-wide association studies (TWAS). In the Carolina  
7 Breast Cancer Study, using race-specific predictive models of tumor expression from germline genetics,  
8 we performed race-stratified (N=1,043 WW, 1083 BW) linear regressions of three CRS (ROR-S: PAM50  
9 subtype score; Proliferation Score; ROR-P: ROR-S plus Proliferation Score) on imputed Genetically-  
10 Regulated tumor eXpression (GReX). Using Bayesian multivariate regression and adaptive shrinkage, we  
11 tested GReX-prioritized genes for associations with PAM50 tumor expression and subtype to elucidate  
12 patterns of germline regulation underlying GReX-CRS associations. At FDR-adjusted  $P < 0.10$ , we  
13 detected 7 and 1 GReX-prioritized genes among WW and BW. Among WW, CRS were positively  
14 associated with *MCM10*, *FAM64A*, *CCNB2*, and *MMP1* GReX and negatively associated with *VAV3*,  
15 *PCSK6*, and *GNG11* GReX. Among BW, higher *MMP1* GReX predicted lower Proliferation score and  
16 ROR-P. GReX-prioritized gene and PAM50 tumor expression associations highlighted potential  
17 mechanisms for GReX-prioritized gene to CRS associations. Among BC patients, we find differential  
18 germline associations with CRS by race, underscoring the need for larger, diverse datasets in molecular  
19 studies of BC. Our findings also suggest possible germline *trans*-regulation of PAM50 tumor expression,  
20 with potential implications for CRS interpretation in clinical settings.

21

## 22 **SIGNIFICANCE**

23 We find race-specific genetic associations with breast cancer risk-of-recurrence scores (CRS). Follow-up  
24 analyses suggest mediation of these associations by PAM50 molecular subtype and gene expression,  
25 with implications for clinical interpretation of CRS.

26

27 *Keywords:* breast cancer recurrence, risk of recurrence, transcriptome-wide association study, molecular  
28 subtype, trans-eQTL mapping

1 **ABBREVIATIONS**

2 BW Black Women

3 CBCS Carolina Breast Cancer Study

4 CRS Continuous Risk of recurrence Score

5 eQTL expression Quantitative Trait Locus

6 ER Estrogen Receptor

7 FDR False Discovery Rate

8 GReX Genetically-Regulated tumor eXpression

9 GWAS Genome-Wide Association Study

10 HR Hormone Receptor

11 LFSR Local False Sign Rate

12 LumA Luminal A

13 LumB Luminal B

14 NC North Carolina

15 ROR Risk of Recurrence

16 SCC Subtype-Centroid Correlations

17 SNP Single Nucleotide Polymorphism

18 TCGA The Cancer Genome Atlas

19 TWAS Transcriptome-Wide Association Study

20 WW White Women

1 **INTRODUCTION (Manuscript Word Count = 4961/5000)**

2 Tumor expression-based molecular profiling has improved clinical classification of breast cancer (1-3).  
3 One tool is the PAM50 assay, which integrates tumor expression of 50 genes (derived from a set of 1,900  
4 subtype-specific genes identified in microarray studies) to determine PAM50 intrinsic molecular subtypes:  
5 Luminal A (LumA), Luminal B (LumB), Human epidermal growth factor 2-enriched (HER2-enriched),  
6 Basal-like, and Normal-like (1,4). Intrinsic molecular subtypes are strong prognostic factors for breast  
7 cancer outcomes, including recurrence and mortality. For instance, Basal-like breast cancer has  
8 substantially higher recurrence and mortality risk compared to LumA breast cancer (5-8). In recent years,  
9 continuous risk of recurrence scores (CRS) have gained traction as a potential clinical tool that  
10 encapsulates prognostic differences of breast cancer intrinsic molecular subtypes into a singular measure  
11 that can be used to guide treatment decisions. CRS include ROR-S, Proliferation score, ROR-P, and  
12 ROR-PT (1,9). ROR-P, for instance, is determined by combining ROR-S (PAM50 tumor expression-based  
13 subtype score) and Proliferation score (tumor expression of 11 PAM50 genes). ROR-PT further integrates  
14 ROR-P with information on tumor size. Studies show that CRS offer significant prognostic information  
15 beyond clinical variables (e.g., nodal status, tumor grade, age, hormonal therapy), improve adjuvant  
16 treatment decisions, and offer robust risk stratification for distant (5-10 years post diagnosis) recurrence  
17 (10-12).

18  
19 In the Carolina Breast Cancer Study (CBCS), Black women (BW) with breast cancer have  
20 disproportionately higher CRS than White Women (9), and similar disparities have been noted in  
21 Oncotype Dx recurrence score (9,13). Systemic injustices, like disparities in healthcare access, explain a  
22 substantial proportion of breast cancer outcome disparities (14-17). Recent studies additionally suggest  
23 that germline genetic variation is associated with breast cancer outcomes, and these associations vary  
24 across ancestry groups (18-21). In The Cancer Genome Atlas (TCGA), BW had substantially higher  
25 polygenic risk scores for the more aggressive ER-negative subtype than WW, suggesting differential  
26 genetic contributions for susceptibility for breast cancer, especially ER-negative breast cancer (21). In a  
27 transcriptome-wide association study (TWAS) of breast cancer mortality, germline-regulated gene  
28 expression (GRex) of four genes was associated with mortality among BW and gene expression for no

1 genes was associated among WW (18). However, the role of germline genetic variation in recurrence,  
2 CRS, and CRS disparity remains a critical knowledge gap. Studying genetic associations with breast  
3 cancer outcomes in BW is necessary to ensure advancements in breast cancer genetics are not limited to  
4 or generalizable in only White populations, thus aiding in decreasing health disparities.

5

6 As racially-diverse genetic datasets typically have small samples of BW, gene-level association tests can  
7 increase study power. These approaches include TWAS, which integrates relationships between single  
8 nucleotide polymorphisms (SNP) and gene expression with genome-wide association studies (GWAS) to  
9 prioritize gene-trait associations (22,23). TWAS aids in interpreting genetic associations by mapping  
10 significant GWAS associations to tissue-specific expression of individual genes. In cancer applications,  
11 TWAS has identified susceptibility genes at loci previously undetected through GWAS, highlighting its  
12 improved power and interpretability (24-26). Previous studies show that stratification of the entire TWAS  
13 (model training, imputation, and association testing) is preferable in diverse populations, as models may  
14 perform poorly across ancestry groups and methods for TWAS in admixed populations are unavailable  
15 (18,27).

16

17 Here, using data from the CBCS, which includes a large sample of Black breast cancer patients with  
18 tumor gene expression data, we study race-specific germline genetic associations for CRS using a gene-  
19 based association testing approach that borrows from TWAS methodology. CRS included in this study  
20 are ROR-S, Proliferation score, and ROR-P. Using race-specific predictive models for tumor expression  
21 from germline genetics, we identify sets of GReX-prioritized genes (i.e. genes whose GReX is associated  
22 with CRS) across BW and WW. We additionally investigate ROR-P specific GReX-prioritized genes for  
23 associations with PAM50 subtype and subtype-specific tumor gene expression to elucidate germline  
24 contributions to PAM50 subtype, and how these mediate GReX-prioritized gene and CRS associations.  
25 Unlike previous studies that correlated tumor gene expression (as opposed to germline-regulated tumor  
26 gene expression) with subtype or subtype-specific tumor gene expression, TWAS enables directional  
27 interpretation of observed associations (22,23).

28

## 1 MATERIALS AND METHODS

### 2 *Data collection*

#### 3 *Study population*

4 The CBCS is a population-based study of North Carolina (NC) breast cancer patients, enrolled in three  
5 phases; study details have been previously described (28,29). Patients aged 20 to 74 were identified  
6 using rapid case ascertainment with the NC Central Cancer Registry with randomized recruitment to  
7 oversample self-identified Black and young women (ages 20-49) (9,29). Demographic and clinical data  
8 (age, menopausal status, body mass index, hormone receptor status, tumor stage, study phase,  
9 recurrence) were obtained through questionnaires and medical records. The study was approved by the  
10 Office of Human Research Ethics at the University of North Carolina at Chapel Hill, and informed consent  
11 was obtained from each participant.

#### 13 *CBCS genotype data*

14 Genotypes were assayed on the OncoArray Consortium's custom SNP array (Illumina Infinium  
15 OncoArray) (30) and imputed using the 1000 Genomes Project (v3) as a reference panel for two-step  
16 phasing and imputation using SHAPEIT2 and IMPUTEv2 (31-34). The DCEG Cancer Genomics  
17 Research Laboratory conducted genotype calling, quality control, and imputation (30). We excluded  
18 variants with less than 1% minor allele frequency and deviations from Hardy-Weinberg equilibrium at  $P <$   
19  $10^{-8}$  (35,36). We intersected genotyping panels for BW and WW samples, resulting in 5,989,134  
20 autosomal variants and 334,391 variants on the X chromosome (37). We only consider the autosomal  
21 variants in this study.

#### 23 *CBCS gene expression data*

24 Paraffin-embedded tumor blocks were assayed for gene expression of 406 breast cancer-related and 11  
25 housekeeping genes using NanoString nCounter at the Translational Genomics Laboratory at UNC-  
26 Chapel Hill (4,9). These 406 breast cancer-related genes include genes part of the PAM50, P53, E2, IGF,  
27 and EGFR signatures, among others (**Supplementary Table S1**). As described previously, we eliminated  
28 samples with insufficient data quality using NanoStringQCPro (18,38), scaled distributional difference

1 between lanes with upper-quartile normalization (39), and removed two dimensions of unwanted technical  
2 and biological variation, estimated from housekeeping genes using RUVSeq (39,40). The current analysis  
3 included 1,199 samples with both genotype and gene expression data (628 BW, 571 WW).

## 5 **Statistical analysis**

### 6 *Overview of GReX and TWAS*

7 We adopted TWAS methodology to construct GReX (exposure of interest in this study). GReX for a given  
8 gene represents the portion of tumor expression explained by *cis*-genetic regulation; GReX was  
9 constructed for the aforementioned set of BC-related genes (**Supplementary Table S1**). Briefly, TWAS  
10 integrates expression data with GWAS to prioritize gene-level germline-trait associations through a two-  
11 step analysis (**Figure 1A-BW**). First, using germline and transcriptomic data, we trained predictive models  
12 of tumor gene expression using all SNPs within 0.5 Megabase of the gene (18,23). Second, we used  
13 these models to impute the GReX of a gene by multiplying the SNP-gene weights from the predictive  
14 model with the dosages of each SNP. Associations between GReX (for a given gene) and trait (CRS, for  
15 instance) in regression analyses identify gene-trait relationships that are a consequence of germline  
16 variation. If sufficiently heritable genes are assayed in the correct tissue, TWAS-based GReX analyses  
17 increase power to detect germline-trait associations and aids interpretability of results, as associations  
18 are mapped from germline genetics to individual genes (23,41).

19

### 20 *GReX analysis of CRS in CBCS*

21 We adopted techniques from FUSION to train predictive models of tumor expression from *cis*-germline  
22 genotypes (18,23). Motivated by strong associations between germline genetics and tumor expression in  
23 CBCS (18), for genes with non-zero *cis*-heritability at nominal  $P < 0.10$ , we trained predictive models for  
24 covariate-residualized tumor expression with all *cis*-SNPs within 0.5 Megabase using linear mixed  
25 modeling or elastic net regression (**Supplementary Methods, Supplementary Materials**) (42,43). Here,  
26 we used the 628 BW samples and 571 WW samples with both genotype and expression data to train  
27 these race-specific expression models. We selected models with five-fold cross-validation adjusted  $R^2 >$   
28 0.01 between predicted and observed expression values, resulting in 59 and 45 models for WW and BW,

1 respectively. Further details on these models, including heritability and cross-validation performance are  
2 available at **Supplementary Table S2**. These models also showed sufficiently strong predictive  
3 performance in external validation using TCGA data (18).

4

5 Using only germline genetics as input, we imputed GReX in 1,043 WW and 1,083 BW, respectively, in  
6 CBCS. For samples not present in the training dataset, we multiplied the SNP weights from the predictive  
7 models with the SNP dosages to construct GReX. For samples in both the training and imputation  
8 datasets, GReX was imputed via cross-validation to minimize data leakage. We tested GReX for  
9 associations with ROR-S, Proliferation Score, and ROR-P using multiple linear regression adjusted for  
10 age, estrogen receptor (ER) status, tumor stage, and study phase (1). We corrected for test-statistic bias  
11 and inflation using a Bayesian bias and inflation adjustment method *bacon*, as TWAS are prone to bias  
12 and inflation of test statistics (44). We then adjusted for multiple testing using the Benjamini-Hochberg  
13 procedure (44,45). As a comparison for the germline effect of GReX-prioritized genes, we additionally  
14 assessed the effect of total (germline-regulated and post-transcriptional) tumor expression of those  
15 GReX-prioritized genes on CRS using similar linear models. We were underpowered to study time-to-  
16 recurrence, as recurrence data was collected only in CBCS Phase 3 (635 WW, 742 BW with GReX and  
17 recurrence data; 183 WW, 283 BW with tumor expression and recurrence data). For significant GReX-  
18 prioritized genes for CRS (FDR-adjusted  $P < 0.10$ ), we conducted follow-up permutation tests: we shuffle  
19 the SNP-gene weights in the predictive model 5,000 times to generate a null distribution and compare the  
20 original GReX-CRS associations to this null distribution. This permutation test assessed whether the  
21 GReX association provides more tissue-specific expression context, beyond any strong SNP-CRS  
22 associations at the genetic locus (23).

23

#### 24 *PAM50 assay and ROR-S, Proliferation score, and ROR-P calculation*

25 As described previously (1), using partition-around-medoid clustering, we calculated the correlation with  
26 each subtype's centroid for study individuals based on PAM50 expressions (10 PAM50 genes per  
27 subtype). The largest subtype-centroid correlation defined the individual's molecular subtype. ROR-S was  
28 determined via a linear combination of the PAM50 subtype-centroid correlations (SCCs); the coefficients



1 to the PAM50 SCCs in the linear combination are positive for Luminal B, HER2-enriched, and Basal-like  
2 and negative for Luminal A (1). Proliferation score was computed using log-scale expression of 11  
3 PAM50 genes, while ROR-P was computed by combining ROR-S and Proliferation score.

4

5 Assignment of PAM50 gene to subtype was based on PAM50 gene centroid values for each subtype; a  
6 PAM50 gene is assigned to the subtype with the largest positive centroid value. Subtype assignment  
7 through this “greedy algorithm” are specific to this study and represent a simplified reality (e.g., *ESR1*  
8 classified as part of Luminal A subtype only even though *ESR1* expression correlates with both Luminal A  
9 and to a slightly lesser degree Luminal B subtype). Moreover, subtype assignment for this portion of  
10 analyses was conducted only for visual comparison of patterns of associations between GReX-prioritized  
11 genes and PAM50 tumor gene expressions (i.e., subtype assignment in this portion of analyses had no  
12 bearing on continuous ROR score calculations or subtype-centroid correlations).

13

#### 14 *Bayesian multivariate regressions and multivariate adaptive shrinkage*

15 As previously noted (1), CRS are functions of PAM50 SCCs and gene expression profiles. Thus, we  
16 followed up on CRS-associated GReX-prioritized genes by studying their associations with PAM50 SCCs  
17 and gene expression. We assessed GReX-prioritized genes (for ROR-P) in relation to SCCs and PAM50  
18 tumor gene expression (**Figure 1C**). Importantly, consistent with the original formulation of ROR-S, we did  
19 not consider normal-like subtype and normal-like subtype specific genes; subtype-specific genes were  
20 determined using a greedy assignment algorithm, described in the previous section. This classification  
21 scheme offers analytic simplicity but is an oversimplification for some PAM50 genes. We found that none  
22 of our GReX-prioritized genes were within 1 Megabase of PAM50 genes and that most GReX-prioritized  
23 genes were not on the same chromosome as PAM50 genes (**Supplementary Table S3**).

24

25 Existing gene-based mapping techniques for *trans*-expression quantitative trait loci (eQTL) (SNP and  
26 gene are separated by more than 1 Megabase) mapping include *trans*-PrediXcan and GBAT (46,47). We  
27 employed Bayesian multivariate linear regression (BtQTL) to account for correlation in multivariate  
28 outcomes (SCCs and PAM50 gene expression) in association testing. BtQTL improves power to detect

1 significant *trans*-associations, especially when considering multiple genes with highly correlated (>0.5)  
2 expression (**Supplementary Figures S1-S2**). Lastly, we conducted adaptive shrinkage on BtQTL  
3 estimates using mashr, an empirical Bayes method to estimate patterns of similarity and improve  
4 accuracy in associations tests across multiple outcomes (48). mashr outputs revised posterior means,  
5 standard deviations, and corresponding measures of significance (local false sign rates, or LFSR).

6  
7 *Associations of genetic ancestry and race with tumor expression and GReX of GReX-prioritized genes*  
8 Prior studies using CBCS have reported concordance between self-reported race and genetic ancestry  
9 (first principal component of combined genotype matrix) (49). In an effort to further contextualize CRS  
10 associations across race and to disentangle race from genetic ancestry in our study population  
11 (specifically, whether race, which captures both genetic ancestry and socioeconomic context, is a proxy  
12 for genetic ancestry in our study population), we investigated: 1) association between genetic ancestry  
13 and tumor expression of GReX-prioritized genes; 2) association between genetic ancestry and GReX of  
14 GReX-prioritized genes; 3) association between race and tumor expression of GReX-prioritized genes; 4)  
15 association between race and GReX of GReX-prioritized genes. Genetic ancestry was computed by  
16 aggregating across local ancestry, as determined through the RFMix pipeline (50).

17

## 18 **RESULTS**

### 19 **Race-specific associations between GReX and CRS**

20 We performed race-specific GReX analysis for CRS to investigate the role of germline genetic variation in  
21 CRS and CRS racial disparity. We identified 8 genes (*MCM10*, *FAM64A*, *CCNB2*, *MMP1*, *VAV3*, *PCSK6*,  
22 *NDC80*, *MLPH*), 8 genes (*MCM10*, *FAM64A*, *CCNB2*, *MMP1*, *VAV3*, *NDC80*, *MLPH*, *EXO1*), and 10  
23 genes (*MCM10*, *FAM64A*, *CCNB2*, *MMP1*, *VAV3*, *PCSK6*, *GNG11*, *NDC80*, *MLPH*, *EXO1*) whose GReX  
24 was associated with ROR-S, proliferation, and ROR-P, respectively, in WW, and 1 gene (*MMP1*) whose  
25 GReX was associated with proliferation and ROR-P in BW at FDR-adjusted  $P < 0.10$  (**Figure 2A, 2B**). No  
26 associations were detected between GReX and ROR-S among BW. We refer to genes with statistically  
27 significant GReX analysis associations (FDR-adjusted  $P < 0.10$ ) as GReX-prioritized genes. Among these  
28 identified genes, only genes that are not part of the PAM50 panel (i.e., excluding *NDC80*, *MLPH*, *EXO1*)

1 were considered in downstream permutation and GReX-prioritized gene follow up analyses (**Figure 1C**),  
2 as we wished to focus investigation on relationship between non-PAM50 GReX-prioritized genes and  
3 PAM50 (tumor) genes. **Supplementary Figure S3** shows results from a sensitivity analysis comparing  
4 the effect sizes for the GReX-CRS associations within samples used in training, not used in training, and  
5 the overall associations using all training and non-training samples. In general, we see concordance in  
6 the direction of association across these three splits of data, though some of the associations detected  
7 within only training or non-training samples intersect the null.

8  
9 Among WW, increased GReX of *MCM10*, *FAM64A*, *CCNB2*, and *MMP1* were associated with higher  
10 CRS while increased GReX of *VAV3*, *PCSK6*, and *GNG11* were associated with lower CRS (**Figure 2A**).  
11 Among BW, increased GReX of *MMP1* was associated with lower CRS (Proliferation, ROR-P, but not  
12 ROR-S) (**Figure 2A**). **Supplementary Figure S4** shows the nominal differences in eQTL architecture  
13 across BW and WW for these genes. In particular, for *MMP1*, we found differences in the standardized  
14 effects across WW and BW: a sizable proportion of shared eQTLs had discordant effects across WW and  
15 BW (**Supplementary Figure S5**). The LD structure for eQTLs differed across WW and BW, with eQTL  
16 effect size peaks ( $-\log_{10}$  p-values: 4.73 (WW); 3.17 (BW)) at differing genomic locations (**Supplementary**  
17 **Figure S5**).

18  
19 Briefly, to contextualize the functions of these GReX-prioritized genes, *MCM10* is involved in DNA  
20 replication, *FAM64A* and *CCNB2* are implicated in progression and regulation of the cell cycle, and  
21 *MMP1*, like the broader *MMP* family, is involved in the breakdown of the extracellular matrix (51-55).  
22 *GNG11* and *VAV3* are involved in signal transduction: *GNG11* as a component of a transmembrane G-  
23 protein and *VAV3* as a guanine nucleotide exchange factor for GTPases (56,57).

24  
25 Associations between tumor expression of GReX-prioritized genes and CRS were concordant, in terms of  
26 direction of association to germline-only effects among WW; findings were discordant among BW where  
27 higher tumor expression of *MMP1* was associated with higher CRS (**Table 1, Supplementary Table S4**).

28 We found differences in the pattern of associations between genetic ancestry and race with tumor

1 expression and GReX of GReX-prioritized genes (**Supplementary Figure S6**). For instance, while higher  
2 African ancestry was associated with higher tumor expression of *MCM10*, higher African ancestry was  
3 instead associated with lower GReX of *MCM10*.

4

#### 5 **Permutation testing provides context to GReX-prioritized gene and CRS associations**

6 To assess the statistical significance for the observed variance in CRS explained by significant GReX-  
7 prioritized genes, we conducted two permutation analyses. First, we assessed the per-gene significance  
8 of the GReX-CRS associations, conditional on the SNP-trait effects at the locus, by generating a null  
9 distribution for the GReX-CRS association via shuffling the SNP-gene weights from the predictive models  
10 5,000 times. We generated a permutation P-value for the GReX-CRS association by comparing to this  
11 null distribution. Here, we found that all GReX-CRS associations showed significance in permutation  
12 testing at FDR-adjusted  $P < 0.05$  (**Table 1**). These per-GReX-prioritized gene permutation tests show that  
13 GReX (of GReX-prioritized genes) adds more context beyond the genetic architecture at the locus and  
14 provide evidence that germline genetics to GReX-prioritized gene expression relationship mediates, to  
15 some level, the complex genetic effects on CRS.

16

17 Next, we quantified the percent variance explained of CRS by the GReX-prioritized genes, in aggregate,  
18 by calculating the model adjusted- $R^2$  for a regression of covariate-residualized CRS on GReX all GReX-  
19 prioritized genes. To context these model adjusted- $R^2$ , we conducted two permutation tests. First, we  
20 permuted the sample labels for covariate-residualized CRS 10,000 times and computed the model  
21 adjusted  $R^2$  at each iteration to generate a null distribution for adjusted  $R^2$  between GReX-prioritized  
22 genes and CRS. Across WW and BW, the observed  $R^2$  of GReX-prioritized genes against CRS (7-10%  
23 among WW and 1% among BW) were statistically significant against the respective null distributions (P-  
24 values and distributions in **Figure 2B**). To further contextualize the proportion of variance in CRS  
25 explained by GReX-prioritized genes, we computed race-specific heritability estimates using GCTA (58).  
26 Given the limited sample size for which CRS data were available, we computed the heritability based on  
27 typed SNPs. Moreover, heritability estimates for CRS were stratified by race. Among WW, heritability  
28 ranged from 0.13 (SE: 0.23) for ROR-S to 0.21 (SE: 0.23) for Proliferation score. Among BW, heritability

1 was much lower and ranged from 0.01 (SE: 0.12) for Proliferation score to 0.02 (SE: 0.14) for ROR-P.  
2 However, we note that heritability estimates from GCTA were imprecise due to limited sample size.  
3 Permutation tests for analyses of tumor expression of GReX-prioritized genes and CRS are available in  
4 **Supplementary Figure S7.**

5  
6 Second, we wanted to assess if the GReX of these sets of GReX-prioritized genes (7 in WW and 1 in  
7 BW) explained more of the variance in CRS than the GReX of a randomly selected set of genes of the  
8 same size. Previous studies have shown that the tumor expression of a set randomly selected genes is  
9 likely to be predictive of breast cancer outcomes; we wished to investigate this phenomenon on the GReX  
10 level (59,60). Over 10,000 repetitions, we randomly selected 7 and 1 genes in WW and BW subjects,  
11 respectively, ran a multivariable regression, and calculated the model adjusted-R<sup>2</sup> to generate another  
12 null distribution. Here again, we found that the true model R<sup>2</sup> outperformed the null distribution, all  
13 showing permutation P < 0.05 in these settings (**Figure 2B**). These permutation tests show that our  
14 GReX-prioritized genes, taken together, appreciably explain differences in CRS.

#### 16 **Associations between GReX-prioritized genes and PAM50 subtype correlations and gene** 17 **expression**

18 As CRS are constructed from PAM50 subtype-specific correlations and gene expression profiles, we  
19 further studied associations between GReX of GReX-prioritized genes and PAM50 SCCs and gene  
20 expression to understand how PAM50 subtype and gene expression mediate GReX-prioritized gene and  
21 CRS associations. Among WW, a one standard deviation increase in *FAM64A* and *CCNB2* GReX  
22 resulted in significantly increased Basal-like SCC while an identical increase in *VAV3*, *PCSK6*, and  
23 *GNG11* GReX resulted in significantly increased Luminal A SCC. The magnitude of increase in  
24 correlation for respective subtypes per GReX-prioritized gene was approximately 0.05, and most  
25 estimates had credible intervals that did not intersect the null. Among WW, associations between HER2-  
26 like SCC and GReX-prioritized genes followed similar patterns to associations for the Basal-like subtype,  
27 although associations for HER2 were more precise (**Figure 3A**). We found predominantly null  
28 associations between GReX-prioritized genes and Luminal B SCC among WW (**Figure 3A**). Unlike in

1 WW, for BW, an increase in *MMP1* GReX was not associated with Luminal A, HER2 or Basal-like SCCs.  
2 Instead, among BW, *MMP1* GReX was significantly negatively associated with Luminal B SCC. Estimates  
3 from univariate regressions are provided in **Supplementary Tables S5-S8**.

4

5 For both WW and BW, the pattern of associations between GReX-prioritized genes and PAM50 tumor  
6 expression were predominantly congruent with observed associations between GReX-prioritized genes  
7 and PAM50 SCCs as well as GReX-prioritized genes and CRS (**Figure 3, Supplementary Tables S9-**  
8 **S12**). In WW, a one standard deviation increase in *CCNB2* GReX was associated with significantly  
9 increased *ORC6L*, *PTTG1*, and *KIF2C* (Basal-like genes) expression and *UBE2T* and *MYBL2* (LumB  
10 genes) expression. By contrast, a one standard deviation increase in *PCSK6* GReX significantly  
11 increased *BAG1*, *FOXA1*, *MAPT*, and *NAT1* (LumA genes) expression (**Figure 3B**). While increased  
12 *MMP1* GReX was associated with significantly increased expression of *ORC6L* (basal-like gene), *MYBL2*,  
13 and *BIRC5* (LumB genes) among WW, this was not the case among BW. Instead, increased *MMP1*  
14 GReX among BW was significantly associated with increased expression of *SLC39A6* (LumA gene) and  
15 decreased expression of *ACTR3B*, *PTTG1*, and *EXO1* (Basal-like genes) (**Figure 3B**). Associations  
16 between GReX-prioritized genes and PAM50 genes provide a granular, gene interaction level view into  
17 the mediation of the GReX-prioritized gene and CRS association, suggesting that *trans*-regulation of  
18 subtype-specific PAM50 genes by GReX-prioritized genes in breast tumors could be a possible  
19 contributor to subtypes and, subsequently, CRS and recurrence.

20

## 21 **DISCUSSION**

22 Through a GReX analysis, we identified 7 and 1 genes among WW and BW, respectively, for which  
23 genetically-regulated breast tumor expression was associated with CRS and underlying PAM50 gene  
24 expression and subtype. Among WW, these 7 GReX-prioritized genes explained between 7-10% of the  
25 variation in CRS, a large and statistically significant proportion of variance. Among BW, the singular  
26 GReX prioritized gene explained a statistically significant ~1% of the variation in Proliferation score and  
27 ROR-P. The magnitudes of these estimates were concordant with race-specific heritability estimates for  
28 CRS (13-21% for WW; 1-2% or BW) in this study population and suggest higher germline genetic

1 contribution to CRS among WW compared to BW and as substantial contribution of GReX-prioritized  
2 genes to race-specific CRS heritability. There are two key novel aspects to this study. First, existing  
3 literature on associations between tumor gene expression and recurrence (for which CRS are a proxy)  
4 cannot distinguish between genetic and non-genetic components of effect (61), whereas, here, we  
5 estimate the contribution of the genetic component. Second, GReX analysis allows directional  
6 interpretation of observed associations that are not possible when correlating tumor gene expression and  
7 recurrence. For instance, prior studies report *CCNB2* is upregulated in triple-negative breast cancers  
8 (TNBC) but were unable to determine whether increased *CCNB2* expression contributes to development  
9 or maintenance of TNBC or is part of the molecular response to cancer progression (62,63). By contrast,  
10 GReX is a function of only genetic variation. As such, we can confidently rule out that differences  
11 in *CCNB2* GReX are not direct consequences of subtype (and by extension recurrence); however, our  
12 observed associations of *CCNB2* GReX and subtype suggest a potential directional relationship for  
13 further study. Thus, GReX analysis allows a directional, potentially causal interpretation, subject to  
14 effective control for population stratification, minimal horizontal pleiotropy, and assumptions of  
15 independent assortment of alleles (22,23).

16

17 Our GReX-prioritized gene and subtype associations among WW are consistent with literature on the  
18 association between tumor (i.e., genetic and non-genetic) expression of our GReX-prioritized genes and  
19 subtype. Prior investigations in cohorts of primarily European ancestry have reported that *MCM10*,  
20 *FAM64A*, and *CCNB2* expression is higher in ER-negative compared to ER-positive tumors (62-64). In  
21 studies that compared triple-negative and non-triple negative subtypes, higher *MCM10*, *FAM64A*, and  
22 *CCNB2* expression was detected in triple-negative breast cancer (62,63). Histologically, HER2-enriched  
23 and Basal-like subtypes are typically ER-negative, and triple-negatives are similar to Basal-like subtypes  
24 (9,65). Moreover, our findings among WW that GReX of *PCSK6* and *VAV3* associated with LumA  
25 subtype and LumA-specific gene expression are also consistent with previous results of *PCSK6* and  
26 *VAV3* upregulation in ER-positive subtypes (66,67). Importantly, our associations suggest directional  
27 mechanisms: from germline variation, to GReX of GReX-prioritized gene, and ultimately, to subtype.

28

1 Presently, little is known about germline genetic regulation of PAM50 tumor expression. In CBCS, we  
2 found that tumor expression of most PAM50 genes is not *cis*-heritable (18). Instead, observed GReX-  
3 prioritized gene and PAM50 gene expression associations may implicate *trans*-gene regulation of the  
4 PAM50 signature. For instance, we found that *VAV3* GReX is significantly positively associated with  
5 tumor expression of *BAG1*, *FOXA1*, *MAPT*, and *NAT1* and nominally with increased tumor *ESR1*  
6 expression, all of which correspond well with LumA signature. Such *trans*-genic regulation signals,  
7 especially in the case of *ESR1*, pose significant clinical and therapeutic implication if confirmed under  
8 experimental conditions. For example, *VAV3* has been shown to activate *RAC1*, which upregulates *ESR1*  
9 (68,69), but such mechanistic evidence is sparse for other putative GReX-prioritized gene to PAM50  
10 associations. More generally, two of the GReX-prioritized genes among WW have been found to activate  
11 transcription factors; *FAM64A* enhances oncogenic nuclear factor-kappa B (NF- $\kappa$ B) signaling while both  
12 *FAM64A* and *PCSK6* activate oncogenic *STAT3* signaling (70-72).

13  
14 Interestingly, we found *MMP1* GReX has divergent associations with CRS across race. There are a few  
15 potential explanations. While heritability and proportion of variance in *MMP1* expression were similar  
16 across WW and BW predictive models, we found that the range of *MMP1* GReX was manifold among  
17 WW than BW. Potential differences in influence of germline genetics on tumor expression and CRS by  
18 race could be an artifact of divergent somatic or epigenetic factors that CBCS has not assayed (73-76).  
19 Second, while studies generally report that *MMP1* tumor expression is higher in triple-negative and Basal-  
20 like breast cancer, one study reported that *MMP1* expression in tumor cells does not significantly differ by  
21 subtype (77-79). Instead, Bostrom *et al.* reported that *MMP1* expression differs in stromal cells of patients  
22 with different subtypes (79). There is evidence to suggest that tumor composition, including stromal and  
23 immune components, may influence breast cancer progression in a subtype-specific manner. Future  
24 studies should consider expression predictive models that integrate greater detail on tumor cell-type  
25 composition to disentangle potential race-specific tumor composition effects on race-specific GReX  
26 associations (80,81).

27



1 In this study, race (derived from self-report) captures genetic ancestry and additionally, socioeconomic  
2 context. Prior investigations using CBCS data have reported concordance between self-reported race and  
3 the first principal component of the combined (i.e. WW and BW) genotype matrix. In our analysis of local-  
4 ancestry derived global ancestry estimates and self-reported race, we found a similar, high level of  
5 concordance. In the absence of available methods that allow stratification or adjustments based on  
6 genetic ancestry across the GReX analytic framework, the use of race as a stratifying variable is intended  
7 to serve as a proxy for stratification by genetic ancestry. We acknowledge the limitation that race may not  
8 be a viable proxy across other populations outside CBCS, and that it is challenging to parse effects seen  
9 across race into effects of genetic ancestry and effects of socioeconomic context.

10  
11 We found marked differences in the pattern of associations between genetic ancestry and race with tumor  
12 expression and GReX of GReX-prioritized genes, highlighting potential differences in contributions of  
13 germline and non-germline components to tumor expression across European and African ancestry  
14 groups. One particular example is *MCM10*. In the literature, higher *MCM10* tumor expression is correlated  
15 with Basal-like subtype, which is more prevalent among BW. The spectrum of our observations suggest  
16 that higher *MCM10* tumor expression is associated with Basal-like subtype across both BW and WW, but  
17 that the germline-regulated component of this expression may be stronger among WW. Similar patterns  
18 were seen for *FAM64A* and *CCNB2*. Analyses by race instead of genetic ancestry yielded associations  
19 similar in magnitude and direction. Racial differences in non-germline components of tumor expression,  
20 including tumor methylation and somatic alternations, may partly explain race-specific differences in  
21 GReX-prioritized genes (18,73-76,82,83). Other factors that warrant further investigation include potential  
22 greater contribution of *trans*-regulation in tumor gene expression in BW (methods for capturing *trans*-  
23 regulation in gene expression predictive models are not as well-developed as those for *cis*-regulation)  
24 (18). These factors should be investigated further as transcriptomic and epigenomic datasets for racially-  
25 diverse cohorts of breast cancer patients become available.

26  
27 There are a few limitations to this study. First, as CBCS used a Nanostring nCounter probeset for mRNA  
28 expression quantification of genes relevant for breast cancer, we could not analyze the whole human

1 transcriptome. While this probeset may exclude several *cis*-heritable genes, CBCS contains one of the  
2 largest breast tumor transcriptomic datasets for Black women, allowing us to build well-powered race-  
3 specific predictive models, a pivotal step in ancestry-specific GReX analysis. Second, CBCS lacked data  
4 on somatic amplifications and deletions, inclusion of which could enhance the performance of predictive  
5 models of tumor expression (84). Third, as recurrence data was collected in a small subset with few  
6 recurrence events, we were unable to make a direct comparison between CRS and recurrence results,  
7 which may affect clinical generalizability. However, to our knowledge, CBCS is the largest resource of  
8 PAM50-based CRS data.

9

10 Our analysis provides evidence of race-specific putative germline associations to CRS, mediated through  
11 associations between genetically-regulated tumor expression of GReX-prioritized genes and PAM50  
12 expressions and subtype. This work underscores the need for larger and more diverse cohorts for genetic  
13 epidemiology studies of breast cancer. Future studies should consider subtype-specific genetics (i.e.,  
14 stratification by subtype in predictive model training and association analyses) to elucidate heritable gene  
15 expression effects on breast cancer outcomes both across and within subtype, which may yield further  
16 hypotheses for more fine-tuned clinical intervention.

17

## 18 **ACKNOWLEDGEMENTS**

19 We thank the Carolina Breast Cancer Study participants and volunteers. We also thank Colin Begg,  
20 Jianwen Cai, Katherine Hoadley, Yun Li, and Bogdan Pasaniuc for valuable discussion during the  
21 research process. We thank Erin Kirk and Jessica Tse for their invaluable support during the research  
22 process. We thank the DCEG Cancer Genomics Research Laboratory and acknowledge the support from  
23 Stephen Chanock, Rose Yang, Meredith Yeager, Belynda Hicks, and Bin Zhu.

24

## 25 **FUNDING**

26 This work was supported by Susan G. Komen® for the Cure for CBCS study infrastructure. Funding was  
27 provided by the National Institutes of Health, National Cancer Institute P01-CA151135, P50-CA05822,  
28 and U01-CA179715 to AFO, CMP, and MAT. AP is supported by T32ES007018. MIL is supported by

1 R01-HG009937, R01-MH118349, P01-CA142538, and P30-ES010126. The Translational Genomics  
2 Laboratory is supported in part by grants from the National Cancer Institute (3P30CA016086) and the  
3 University of North Carolina at Chapel Hill University Cancer Research Fund. Genotyping was done at the  
4 DCEG Cancer Genomics Research Laboratory using funds from the NCI Intramural Research Program.  
5 This content is solely the responsibility of the authors and does not necessarily represent the official  
6 views of the National Institutes of Health. The funder had no role in study design, data collection, analysis  
7 or interpretation, or writing of the manuscript.

8

9 Funding for BCAC came from: Cancer Research UK [grant numbers C1287/A16563,  
10 C1287/A10118, C1287/A10710, C12292/A11174, C1281/A12014, C5047/A8384, C5047/A15007,  
11 C5047/A10692, C8197/A16565], the European Union's Horizon 2020 Research and Innovation  
12 Programme (grant numbers 634935 and 633784 for BRIDGES and B-CAST respectively), the European  
13 Community's Seventh Framework Programme under grant agreement n° 223175 [HEALTHF2-2009-  
14 223175] (COGS), the National Institutes of Health [CA128978] and Post-Cancer GWAS initiative [1U19  
15 CA148537, 1U19 CA148065-01 (DRIVE) and 1U19 CA148112 - the GAME-ON initiative], the Department  
16 of Defence [W81XWH-10-1-0341], and the Canadian Institutes of Health Research (CIHR) for the CIHR  
17 Team in Familial Risks of Breast Cancer [grant PSR-SIIRI-701]. All studies and funders as listed in  
18 Michailidou K *et al* (2013 and 2015) and in Guo Q *et al* (2015) are acknowledged for their contributions.

19

## 20 **AUTHOR CONTRIBUTIONS**

21 Conceptualization: AP, MAT, MIL, AB. Data curation: MG, AFO, CMP, MAT. Formal analysis: AP, MAT,  
22 MIL, AB. Funding acquisition: AP, MG, AFO, CMP, MAT, MIL. Methodology: AP, MIL, AB. Project  
23 administration: MAT, MIL, AB. Resources: MG, AFO, CMP, MAT, MIL. Supervision: MAT, MIL, AB.  
24 Visualization: AP, AB. Writing – original draft: AP, AB. Writing – reviewing and editing: AP, MG, AFO,  
25 CMP, MAT, MIL, AB.

26

## 27 **AVAILABILITY OF DATA AND MATERIALS**

1 Expression data from CBCS is available on NCBI GEO with accession number GSE148426. CBCS  
2 genotype datasets analyzed in this study are not publicly available as many CBCS patients are still being  
3 followed and accordingly CBCS data is considered sensitive; the data is available from M.A.T upon  
4 reasonable request. Supplementary Data includes summary statistics for eQTL results, tumor expression  
5 models, and relevant R code for training expression models in CBCS and are freely available  
6 at [https://github.com/bhattacharya-a-bt/CBCS\\_TWAS\\_Paper/](https://github.com/bhattacharya-a-bt/CBCS_TWAS_Paper/). Scripts utilized in this analysis are provided  
7 at <https://github.com/APUNC/CBCS---Risk-of-Recurrence-Paper>.

8

## 9 REFERENCES

- 10 1. Parker JS, Mullins M, Cheang MC, Leung S, Voduc D, Vickery T, *et al*. Supervised risk predictor  
11 of breast cancer based on intrinsic subtypes. *J Clin Oncol* **2009**;27:1160-7
- 12 2. Wallden B, Storhoff J, Nielsen T, Dowidar N, Schaper C, Ferree S, *et al*. Development and  
13 verification of the PAM50-based Prosigna breast cancer gene signature assay. *BMC Med*  
14 *Genomics* **2015**;8:54
- 15 3. Paik S, Shak S, Tang G, Kim C, Baker J, Cronin M, *et al*. A multigene assay to predict recurrence  
16 of tamoxifen-treated, node-negative breast cancer. *N Engl J Med* **2004**;351:2817-26
- 17 4. Geiss GK, Bumgarner RE, Birditt B, Dahl T, Dowidar N, Dunaway DL, *et al*. Direct multiplexed  
18 measurement of gene expression with color-coded probe pairs. *Nat Biotechnol* **2008**;26:317-25
- 19 5. Carey LA, Perou CM, Livasy CA, Dressler LG, Cowan D, Conway K, *et al*. Race, breast cancer  
20 subtypes, and survival in the Carolina Breast Cancer Study. *Jama* **2006**;295:2492-502
- 21 6. O'Brien KM, Cole SR, Tse CK, Perou CM, Carey LA, Foulkes WD, *et al*. Intrinsic breast tumor  
22 subtypes, race, and long-term survival in the Carolina Breast Cancer Study. *Clin Cancer Res*  
23 **2010**;16:6100-10
- 24 7. Shim HJ, Kim SH, Kang BJ, Choi BG, Kim HS, Cha ES, *et al*. Breast cancer recurrence according  
25 to molecular subtype. *Asian Pac J Cancer Prev* **2014**;15:5539-44
- 26 8. van Maaren MC, de Munck L, Strobbe LJA, Sonke GS, Westenend PJ, Smidt ML, *et al*. Ten-year  
27 recurrence rates for breast cancer subtypes in the Netherlands: A large population-based study.  
28 *Int J Cancer* **2019**;144:263-72

- 1 9. Troester MA, Sun X, Allott EH, Geradts J, Cohen SM, Tse CK, *et al.* Racial Differences in PAM50  
2 Subtypes in the Carolina Breast Cancer Study. *J Natl Cancer Inst* **2018**;110:176-82
- 3 10. Dowsett M, Sestak I, Lopez-Knowles E, Sidhu K, Dunbier AK, Cowens JW, *et al.* Comparison of  
4 PAM50 Risk of Recurrence Score With Oncotype DX and IHC4 for Predicting Risk of Distant  
5 Recurrence After Endocrine Therapy. *Journal of Clinical Oncology* **2013**;31:2783-90
- 6 11. Sestak I, Buus R, Cuzick J, Dubsy P, Kronenwett R, Denkert C, *et al.* Comparison of the  
7 Performance of 6 Prognostic Signatures for Estrogen Receptor-Positive Breast Cancer: A  
8 Secondary Analysis of a Randomized Clinical Trial. *JAMA Oncol* **2018**;4:545-53
- 9 12. Ohnstad HO, Borgen E, Falk RS, Lien TG, Aaserud M, Sveli MAT, *et al.* Prognostic value of  
10 PAM50 and risk of recurrence score in patients with early-stage breast cancer with long-term  
11 follow-up. *Breast Cancer Res* **2017**;19:120
- 12 13. Albain KS, Gray RJ, Makower DF, Faghieh A, Hayes DF, Geyer CE, *et al.* Race, ethnicity and  
13 clinical outcomes in hormone receptor-positive, HER2-negative, node-negative breast cancer in  
14 the randomized TAILORx trial. *J Natl Cancer Inst* **2020**
- 15 14. Reeder-Hayes KE, Anderson BO. Breast Cancer Disparities at Home and Abroad: A Review of  
16 the Challenges and Opportunities for System-Level Change. *Clin Cancer Res* **2017**;23:2655-64
- 17 15. Durham DD, Robinson WR, Lee SS, Wheeler SB, Reeder-Hayes KE, Bowling JM, *et al.*  
18 Insurance-Based Differences in Time to Diagnostic Follow-up after Positive Screening  
19 Mammography. *Cancer Epidemiol Biomarkers Prev* **2016**;25:1474-82
- 20 16. Wheeler SB, Reeder-Hayes KE, Carey LA. Disparities in breast cancer treatment and outcomes:  
21 biological, social, and health system determinants and opportunities for research. *Oncologist*  
22 **2013**;18:986-93
- 23 17. Ko NY, Hong S, Winn RA, Calip GS. Association of Insurance Status and Racial Disparities With  
24 the Detection of Early-Stage Breast Cancer. *JAMA Oncology* **2020**;6:385-92
- 25 18. Bhattacharya A, García-Closas M, Olshan AF, Perou CM, Troester MA, Love MI. A framework for  
26 transcriptome-wide association studies in breast cancer in diverse study populations. *Genome*  
27 *Biol* **2020**;21:42

- 1 19. Escala-Garcia M, Guo Q, Dörk T, Canisius S, Keeman R, Dennis J, *et al.* Genome-wide  
2 association study of germline variants and breast cancer-specific mortality. *Br J Cancer*  
3 **2019**;120:647-57
- 4 20. Muranen TA, Khan S, Fagerholm R, Aittomäki K, Cunningham JM, Dennis J, *et al.* Association of  
5 germline variation with the survival of women with BRCA1/2 pathogenic variants and breast  
6 cancer. *NPJ Breast Cancer* **2020**;6:44
- 7 21. Huo D, Hu H, Rhie SK, Gamazon ER, Cherniack AD, Liu J, *et al.* Comparison of Breast Cancer  
8 Molecular Features and Survival by African and European Ancestry in The Cancer Genome  
9 Atlas. *JAMA Oncol* **2017**;3:1654-62
- 10 22. Gamazon ER, Wheeler HE, Shah KP, Mozaffari SV, Aquino-Michaels K, Carroll RJ, *et al.* A gene-  
11 based association method for mapping traits using reference transcriptome data. *Nat Genet*  
12 **2015**;47:1091-8
- 13 23. Gusev A, Ko A, Shi H, Bhatia G, Chung W, Penninx BW, *et al.* Integrative approaches for large-  
14 scale transcriptome-wide association studies. *Nat Genet* **2016**;48:245-52
- 15 24. Zhong J, Jermusyk A, Wu L, Hoskins JW, Collins I, Mocci E, *et al.* A Transcriptome-Wide  
16 Association Study Identifies Novel Candidate Susceptibility Genes for Pancreatic Cancer. *J Natl*  
17 *Cancer Inst* **2020**;112:1003-12
- 18 25. Wu L, Shi W, Long J, Guo X, Michailidou K, Beesley J, *et al.* A transcriptome-wide association  
19 study of 229,000 women identifies new candidate susceptibility genes for breast cancer. *Nat*  
20 *Genet* **2018**;50:968-78
- 21 26. Mancuso N, Gayther S, Gusev A, Zheng W, Penney KL, Kote-Jarai Z, *et al.* Large-scale  
22 transcriptome-wide association study identifies new prostate cancer risk regions. *Nat Commun*  
23 **2018**;9:4079
- 24 27. Keys KL, Mak ACY, White MJ, Eckalbar WL, Dahl AW, Mefford J, *et al.* On the cross-population  
25 generalizability of gene expression prediction models. *PLoS Genet* **2020**;16:e1008927
- 26 28. Hair BY, Hayes S, Tse CK, Bell MB, Olshan AF. Racial differences in physical activity among  
27 breast cancer survivors: implications for breast cancer care. *Cancer* **2014**;120:2174-82

- 1 29. Newman B, Moorman PG, Millikan R, Qaqish BF, Geradts J, Aldrich TE, *et al.* The Carolina  
2 Breast Cancer Study: integrating population-based epidemiology and molecular biology. *Breast*  
3 *Cancer Res Treat* **1995**;35:51-60
- 4 30. Amos CI, Dennis J, Wang Z, Byun J, Schumacher FR, Gayther SA, *et al.* The OncoArray  
5 Consortium: A Network for Understanding the Genetic Architecture of Common Cancers. *Cancer*  
6 *Epidemiol Biomarkers Prev* **2017**;26:126-35
- 7 31. Auton A, Brooks LD, Durbin RM, Garrison EP, Kang HM, Korbel JO, *et al.* A global reference for  
8 human genetic variation. *Nature* **2015**;526:68-74
- 9 32. O'Connell J, Gurdasani D, Delaneau O, Pirastu N, Ulivi S, Cocca M, *et al.* A general approach for  
10 haplotype phasing across the full spectrum of relatedness. *PLoS Genet* **2014**;10:e1004234
- 11 33. Delaneau O, Marchini J, Zagury JF. A linear complexity phasing method for thousands of  
12 genomes. *Nat Methods* **2011**;9:179-81
- 13 34. Howie BN, Donnelly P, Marchini J. A flexible and accurate genotype imputation method for the  
14 next generation of genome-wide association studies. *PLoS Genet* **2009**;5:e1000529
- 15 35. Wigginton JE, Cutler DJ, Abecasis GR. A note on exact tests of Hardy-Weinberg equilibrium. *Am*  
16 *J Hum Genet* **2005**;76:887-93
- 17 36. Purcell S, Neale B, Todd-Brown K, Thomas L, Ferreira MA, Bender D, *et al.* PLINK: a tool set for  
18 whole-genome association and population-based linkage analyses. *Am J Hum Genet*  
19 **2007**;81:559-75
- 20 37. Sherry ST, Ward MH, Kholodov M, Baker J, Phan L, Smigielski EM, *et al.* dbSNP: the NCBI  
21 database of genetic variation. *Nucleic Acids Res* **2001**;29:308-11
- 22 38. Bhattacharya A, Hamilton AM, Furberg H, Pietzak E, Purdue MP, Troester MA, *et al.* An  
23 approach for normalization and quality control for NanoString RNA expression data. *Brief*  
24 *Bioinform* **2020**
- 25 39. Anders S, Huber W. Differential expression analysis for sequence count data. *Genome Biol*  
26 **2010**;11:R106
- 27 40. Love MI, Huber W, Anders S. Moderated estimation of fold change and dispersion for RNA-seq  
28 data with DESeq2. *Genome Biol* **2014**;15:550

- 1 41. Ding B, Cao C, Li Q, Wu J, Long Q. Power analysis of transcriptome-wide association study.  
2 bioRxiv **2020**:2020.07.19.211151
- 3 42. Endelman JB. Ridge Regression and Other Kernels for Genomic Selection with R Package  
4 rrBLUP. *The Plant Genome* **2011**;4
- 5 43. Friedman J, Hastie T, Tibshirani R. Regularization Paths for Generalized Linear Models via  
6 Coordinate Descent. *J Stat Softw* **2010**;33:1-22
- 7 44. van Iterson M, van Zwet EW, Heijmans BT. Controlling bias and inflation in epigenome- and  
8 transcriptome-wide association studies using the empirical null distribution. *Genome Biol*  
9 **2017**;18:19
- 10 45. Benjamini Y, Hochberg Y. Controlling the False Discovery Rate: A Practical and Powerful  
11 Approach to Multiple Testing. *Journal of the Royal Statistical Society Series B (Methodological)*  
12 **1995**;57:289-300
- 13 46. Wheeler HE, Ploch S, Barbeira AN, Bonazzola R, Andaleon A, Fotuhi Siahpirani A, *et al.* Imputed  
14 gene associations identify replicable trans-acting genes enriched in transcription pathways and  
15 complex traits. *Genetic Epidemiology* **2019**;43:596-608
- 16 47. Liu X, Mefford JA, Dahl A, He Y, Subramaniam M, Battle A, *et al.* GBAT: a gene-based  
17 association test for robust detection of trans-gene regulation. *Genome Biology* **2020**;21:211
- 18 48. Urbut SM, Wang G, Carbonetto P, Stephens M. Flexible statistical methods for estimating and  
19 testing effects in genomic studies with multiple conditions. *Nat Genet* **2019**;51:187-95
- 20 49. Bhattacharya A, García-Closas M, Olshan AF, Perou CM, Troester MA, Love MI. A framework for  
21 transcriptome-wide association studies in breast cancer in diverse study populations. *Genome*  
22 *Biology* **2020**;21:42
- 23 50. Maples BK, Gravel S, Kenny EE, Bustamante CD. RFMix: a discriminative modeling approach for  
24 rapid and robust local-ancestry inference. *American journal of human genetics* **2013**;93:278-88
- 25 51. Watase G, Takisawa H, Kanemaki MT. Mcm10 plays a role in functioning of the eukaryotic  
26 replicative DNA helicase, Cdc45-Mcm-GINS. *Curr Biol* **2012**;22:343-9



- 1 52. Zhao W-m, Coppinger JA, Seki A, Cheng X-l, Yates JR, Fang G. RCS1, a substrate of APC/C,  
2 controls the metaphase to anaphase transition. *Proceedings of the National Academy of*  
3 *Sciences* **2008**;105:13415-20
- 4 53. Daldello EM, Luong XG, Yang C-R, Kuhn J, Conti M. Cyclin B2 is required for progression  
5 through meiosis in mouse oocytes. *Development* **2019**;146:dev172734
- 6 54. Draetta G, Luca F, Westendorf J, Brizuela L, Ruderman J, Beach D. Cdc2 protein kinase is  
7 complexed with both cyclin A and B: evidence for proteolytic inactivation of MPF. *Cell*  
8 **1989**;56:829-38
- 9 55. Page-McCaw A, Ewald AJ, Werb Z. Matrix metalloproteinases and the regulation of tissue  
10 remodelling. *Nat Rev Mol Cell Biol* **2007**;8:221-33
- 11 56. Rao S, Lyons LS, Fahrenholtz CD, Wu F, Farooq A, Balkan W, *et al.* A novel nuclear role for the  
12 Vav3 nucleotide exchange factor in androgen receptor coactivation in prostate cancer. *Oncogene*  
13 **2012**;31:716-27
- 14 57. Hossain MN, Sakemura R, Fujii M, Ayusawa D. G-protein gamma subunit GNG11 strongly  
15 regulates cellular senescence. *Biochem Biophys Res Commun* **2006**;351:645-50
- 16 58. Yang J, Lee SH, Goddard ME, Visscher PM. GCTA: a tool for genome-wide complex trait  
17 analysis. *Am J Hum Genet* **2011**;88:76-82
- 18 59. Venet D, Dumont JE, Detours V. Most random gene expression signatures are significantly  
19 associated with breast cancer outcome. *PLoS Comput Biol* **2011**;7:e1002240
- 20 60. Shimoni Y. Association between expression of random gene sets and survival is evident in  
21 multiple cancer types and may be explained by sub-classification. *PLoS Comput Biol*  
22 **2018**;14:e1006026
- 23 61. Parada H, Jr., Sun X, Fleming JM, Williams-DeVane CR, Kirk EL, Olsson LT, *et al.* Race-  
24 associated biological differences among luminal A and basal-like breast cancers in the Carolina  
25 Breast Cancer Study. *Breast Cancer Res* **2017**;19:131
- 26 62. Prat A, Adamo B, Cheang MC, Anders CK, Carey LA, Perou CM. Molecular characterization of  
27 basal-like and non-basal-like triple-negative breast cancer. *Oncologist* **2013**;18:123-33

- 1 63. Zhang C, Han Y, Huang H, Min L, Qu L, Shou C. Integrated analysis of expression profiling data  
2 identifies three genes in correlation with poor prognosis of triple-negative breast cancer. *Int J*  
3 *Oncol* **2014**;44:2025-33
- 4 64. Mahadevappa R, Neves H, Yuen SM, Jameel M, Bai Y, Yuen HF, *et al.* DNA Replication  
5 Licensing Protein MCM10 Promotes Tumor Progression and Is a Novel Prognostic Biomarker  
6 and Potential Therapeutic Target in Breast Cancer. *Cancers (Basel)* **2018**;10
- 7 65. Hagemann IS. Molecular Testing in Breast Cancer: A Guide to Current Practices. *Arch Pathol*  
8 *Lab Med* **2016**;140:815-24
- 9 66. Thakkar AD, Raj H, Chakrabarti D, Ravishankar, Saravanan N, Muthuvelan B, *et al.* Identification  
10 of gene expression signature in estrogen receptor positive breast carcinoma. *Biomark Cancer*  
11 **2010**;2:1-15
- 12 67. Aguilar H, Urruticoechea A, Halonen P, Kiyotani K, Mushiroda T, Barril X, *et al.* VAV3 mediates  
13 resistance to breast cancer endocrine therapy. *Breast Cancer Res* **2014**;16:R53
- 14 68. Zeng L, Sachdev P, Yan L, Chan JL, Trenkle T, McClelland M, *et al.* Vav3 mediates receptor  
15 protein tyrosine kinase signaling, regulates GTPase activity, modulates cell morphology, and  
16 induces cell transformation. *Mol Cell Biol* **2000**;20:9212-24
- 17 69. Rosenblatt AE, Garcia MI, Lyons L, Xie Y, Maiorino C, Désiré L, *et al.* Inhibition of the Rho  
18 GTPase, Rac1, decreases estrogen receptor levels and is a novel therapeutic strategy in breast  
19 cancer. *Endocr Relat Cancer* **2011**;18:207-19
- 20 70. Xu Z-S, Zhang H-X, Li W-W, Ran Y, Liu T-T, Xiong M-G, *et al.* FAM64A positively regulates  
21 STAT3 activity to promote Th17 differentiation and colitis-associated carcinogenesis.  
22 *Proceedings of the National Academy of Sciences* **2019**;116:10447-52
- 23 71. Jiang H, Wang L, Wang F, Pan J. Proprotein convertase subtilisin/kexin type 6 promotes in vitro  
24 proliferation, migration and inflammatory cytokine secretion of synovial fibroblast-like cells from  
25 rheumatoid arthritis via nuclear- $\kappa$ B, signal transducer and activator of transcription 3 and  
26 extracellular signal regulated 1/2 pathways. *Mol Med Rep* **2017**;16:8477-84

- 1 72. Jiang L, Ren L, Zhang X, Chen H, Chen X, Lin C, *et al.* Overexpression of PIMREG promotes  
2 breast cancer aggressiveness via constitutive activation of NF- $\kappa$ B signaling. *EBioMedicine*  
3 **2019**;43:188-200
- 4 73. Shang L, Smith JA, Zhao W, Kho M, Turner ST, Mosley TH, *et al.* Genetic Architecture of Gene  
5 Expression in European and African Americans: An eQTL Mapping Study in GENOA. *Am J Hum*  
6 *Genet* **2020**;106:496-512
- 7 74. Wang S, Dorsey TH, Terunuma A, Kittles RA, Ambbs S, Kwabi-Addo B. Relationship between  
8 tumor DNA methylation status and patient characteristics in African-American and European-  
9 American women with breast cancer. *PLoS One* **2012**;7:e37928
- 10 75. Conway K, Edmiston SN, Tse CK, Bryant C, Kuan PF, Hair BY, *et al.* Racial variation in breast  
11 tumor promoter methylation in the Carolina Breast Cancer Study. *Cancer Epidemiol Biomarkers*  
12 *Prev* **2015**;24:921-30
- 13 76. Chen Y, Sadasivan SM, She R, Datta I, Taneja K, Chitale D, *et al.* Breast and prostate cancers  
14 harbor common somatic copy number alterations that consistently differ by race and are  
15 associated with survival. *BMC Med Genomics* **2020**;13:116
- 16 77. Wang QM, Lv L, Tang Y, Zhang L, Wang LF. MMP-1 is overexpressed in triple-negative breast  
17 cancer tissues and the knockdown of MMP-1 expression inhibits tumor cell malignant behaviors  
18 in vitro. *Oncol Lett* **2019**;17:1732-40
- 19 78. McGowan PM, Duffy MJ. Matrix metalloproteinase expression and outcome in patients with  
20 breast cancer: analysis of a published database. *Ann Oncol* **2008**;19:1566-72
- 21 79. Boström P, Söderström M, Vahlberg T, Söderström KO, Roberts PJ, Carpén O, *et al.* MMP-1  
22 expression has an independent prognostic value in breast cancer. *BMC Cancer* **2011**;11:348
- 23 80. Acerbi I, Cassereau L, Dean I, Shi Q, Au A, Park C, *et al.* Human breast cancer invasion and  
24 aggression correlates with ECM stiffening and immune cell infiltration. *Integr Biol (Camb)*  
25 **2015**;7:1120-34
- 26 81. González LO, Corte MD, Junquera S, González-Fernández R, del Casar JM, García C, *et al.*  
27 Expression and prognostic significance of metalloproteases and their inhibitors in luminal A and  
28 basal-like phenotypes of breast carcinoma. *Hum Pathol* **2009**;40:1224-33

- 1 82. Gravel S. Population genetics models of local ancestry. *Genetics* **2012**;191:607-19
- 2 83. Nelson D, Kelleher J, Ragsdale AP, Moreau C, McVean G, Gravel S. Accounting for long-range  
3 correlations in genome-wide simulations of large cohorts. *PLoS Genet* **2020**;16:e1008619
- 4 84. Xia Y, Fan C, Hoadley KA, Parker JS, Perou CM. Genetic determinants of the molecular portraits  
5 of epithelial cancers. *Nat Commun* **2019**;10:5666

6

## 7 **FIGURE LEGENDS**

8 **Figure 1.** *Schematic of study analytic approach.* A) In CBCS, constructed race-stratified predictive  
9 models of tumor gene expression from *cis*-SNPs. B) In CBCS, imputed GReX at individual-level using  
10 genotypes and tested for associations between GReX and CRS in race-stratified linear models; only  
11 GReX of genes with significant *cis*- $h^2$  and high cross validation performance ( $R^2 > 0.01$  between observed  
12 and predicted expression) considered for race-stratified association analyses. C) Follow-up analyses on  
13 GReX-prioritized genes (i.e., genes whose GReX were significantly associated with CRS at FDR <0.10).  
14 In race-stratified models, PAM50 SCCs and PAM50 tumor expressions were regressed against GReX-  
15 prioritized genes under a Bayesian multivariate regression and multivariate adaptive shrinkage approach.

16

17 **Figure 2.** *Permutation tests and associations between GReX-prioritized genes and CRS for WW and BW.*  
18 A) Effect estimates correspond to change in ROR-S, Proliferation score, and ROR-P per one standard  
19 deviation increase in GReX-prioritized gene expression (i.e., one standard deviation increase in GReX of  
20 gene). Triangle denotes WW and circle denotes BW. B) Boxplots correspond to null distributions (shuffled  
21 GReX-sample labels on left, random set of genes on right) of covariates residualized-R2 for regressions  
22 of CRS on GReX-prioritized genes. Null distributions are provided for 10,000 permutations of the GReX-  
23 sample labels and 10,000 random sets of genes. Dashed horizontal lines correspond to observed  
24 covariates residualized-R2.

25

26 **Figure 3.** *Associations between GReX-prioritized genes and PAM50 SCCs and gene expression.* A)  
27 Among BW (top) and WW (bottom), associations between GReX-prioritized genes and PAM50 SCCs  
28 using Bayesian multivariate regression and multivariate adaptive shrinkage. Effect estimates show

It is made available under a [CC-BY 4.0 International license](#) .

- 1 change in SCCs (range -1 to 1) for one standard deviation increase in GReX-prioritized gene GReX.
- 2 Circle, triangle, and square denote corresponding LFSR intervals for effect sizes. B) Heatmap of change
- 3 in  $\log_2$  normalized PAM50 tumor expression for one standard deviation increase in GReX-Prioritized gene
- 4 GReX. \*, \*\*, \*\*\* denote FDR intervals for effect sizes.
- 5

1 FIGURES

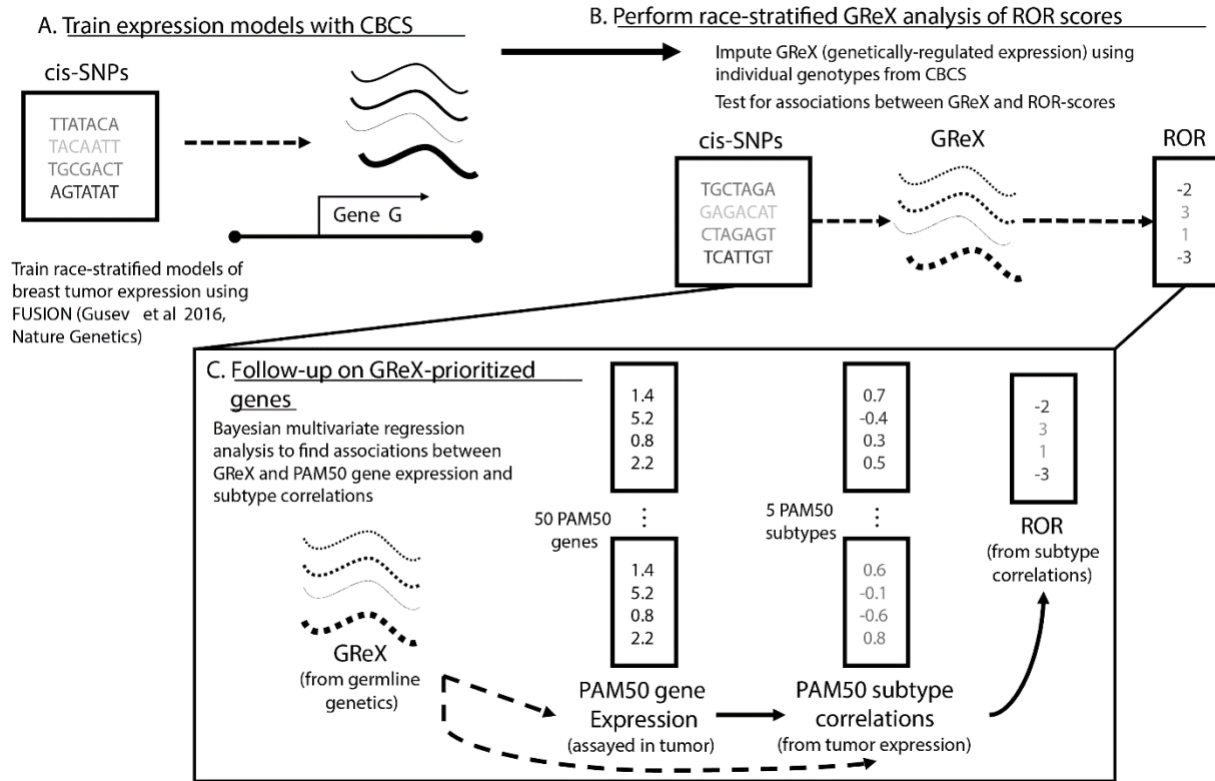

**Figure 1. Schematic of study analytic approach.** A) In CBCS, constructed race-stratified predictive models of tumor gene expression from *cis*-SNPs. B) In CBCS, imputed GREX at individual-level using genotypes and tested for associations between GREX and CRS in race-stratified linear models; only GREX of genes with significant *cis*- $h^2$  and high cross validation performance ( $R^2 > 0.01$  between observed and predicted expression) considered for race-stratified association analyses. C) Follow-up analyses on GREX-prioritized genes (i.e., genes whose GREX were significantly associated with CRS at FDR  $< 0.10$ ). In race-stratified models, PAM50 SCCs and PAM50 tumor expressions were regressed against GREX-prioritized genes under a Bayesian multivariate regression and multivariate adaptive shrinkage approach.

2

It is made available under a [CC-BY 4.0 International license](https://creativecommons.org/licenses/by/4.0/).

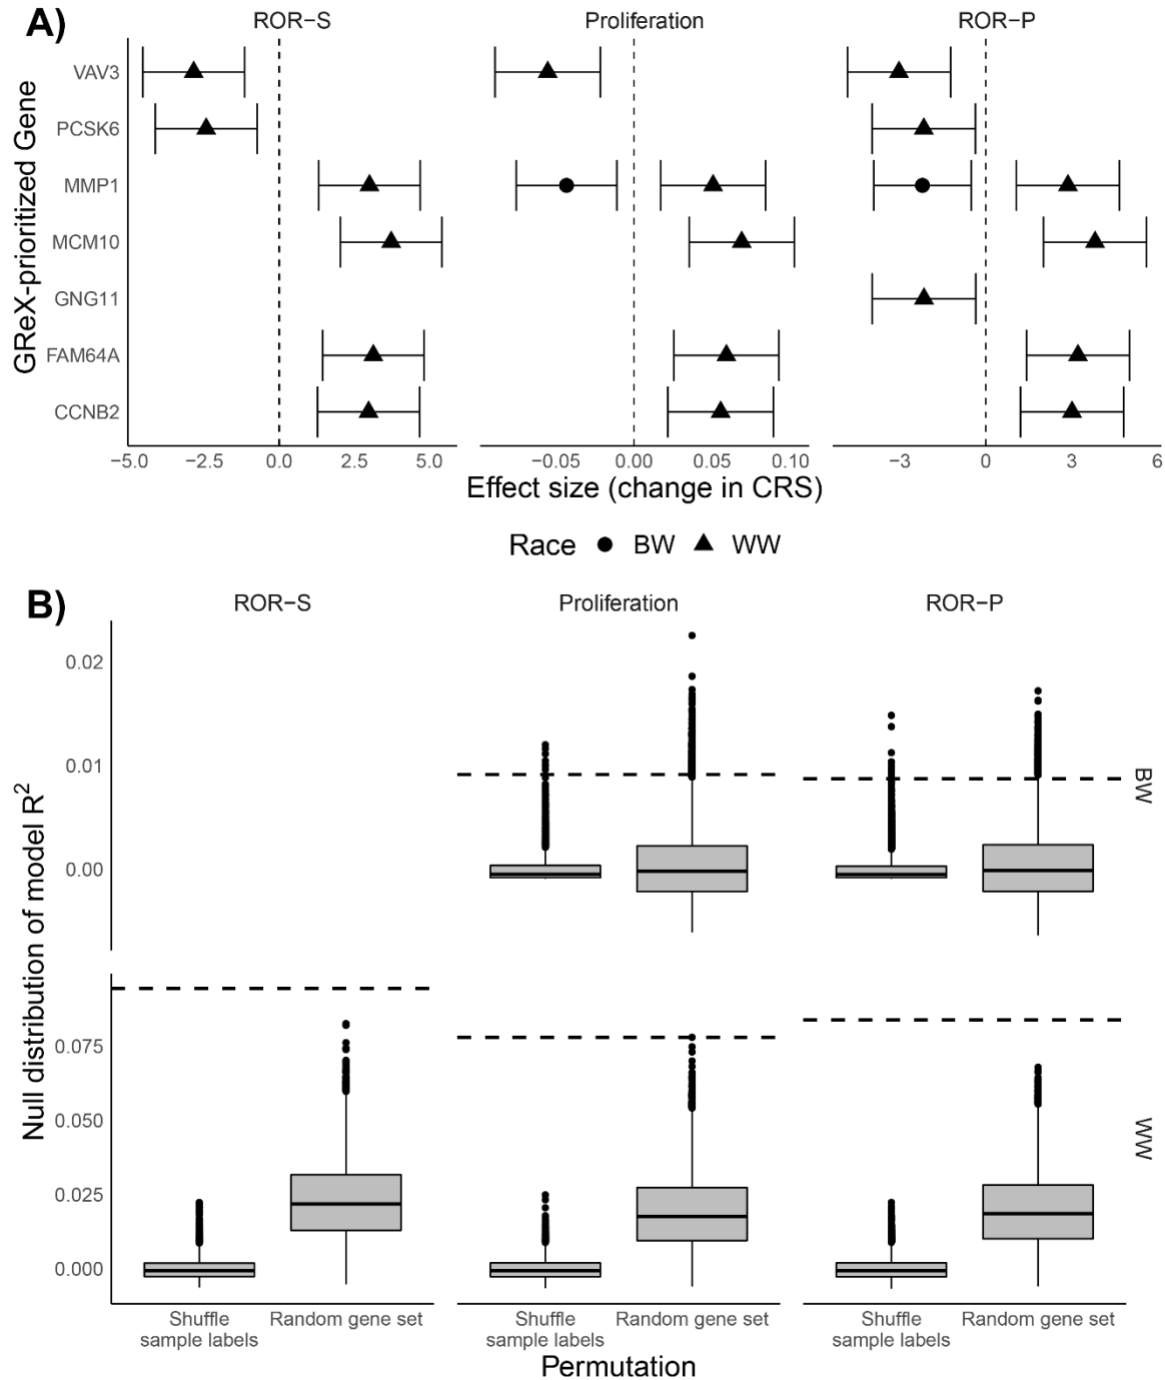

**Figure 2.** Permutation tests and associations between GReX-prioritized genes and CRS for WW and BW. A) Effect estimates correspond to change in ROR-S, Proliferation score, and ROR-P per one standard deviation increase in GReX-prioritized gene expression (i.e., one standard deviation increase in GReX of gene). Triangle denotes WW and circle denotes BW. B) Boxplots correspond to null distributions (shuffled GReX-sample labels on left, random set of genes on right) of covariates residualized- $R^2$  for regressions of CRS on GReX-prioritized genes. Null distributions are provided for 10,000 permutations of the GReX-sample labels and 10,000 random sets of genes. Dashed horizontal lines correspond to observed covariates residualized- $R^2$ .

1

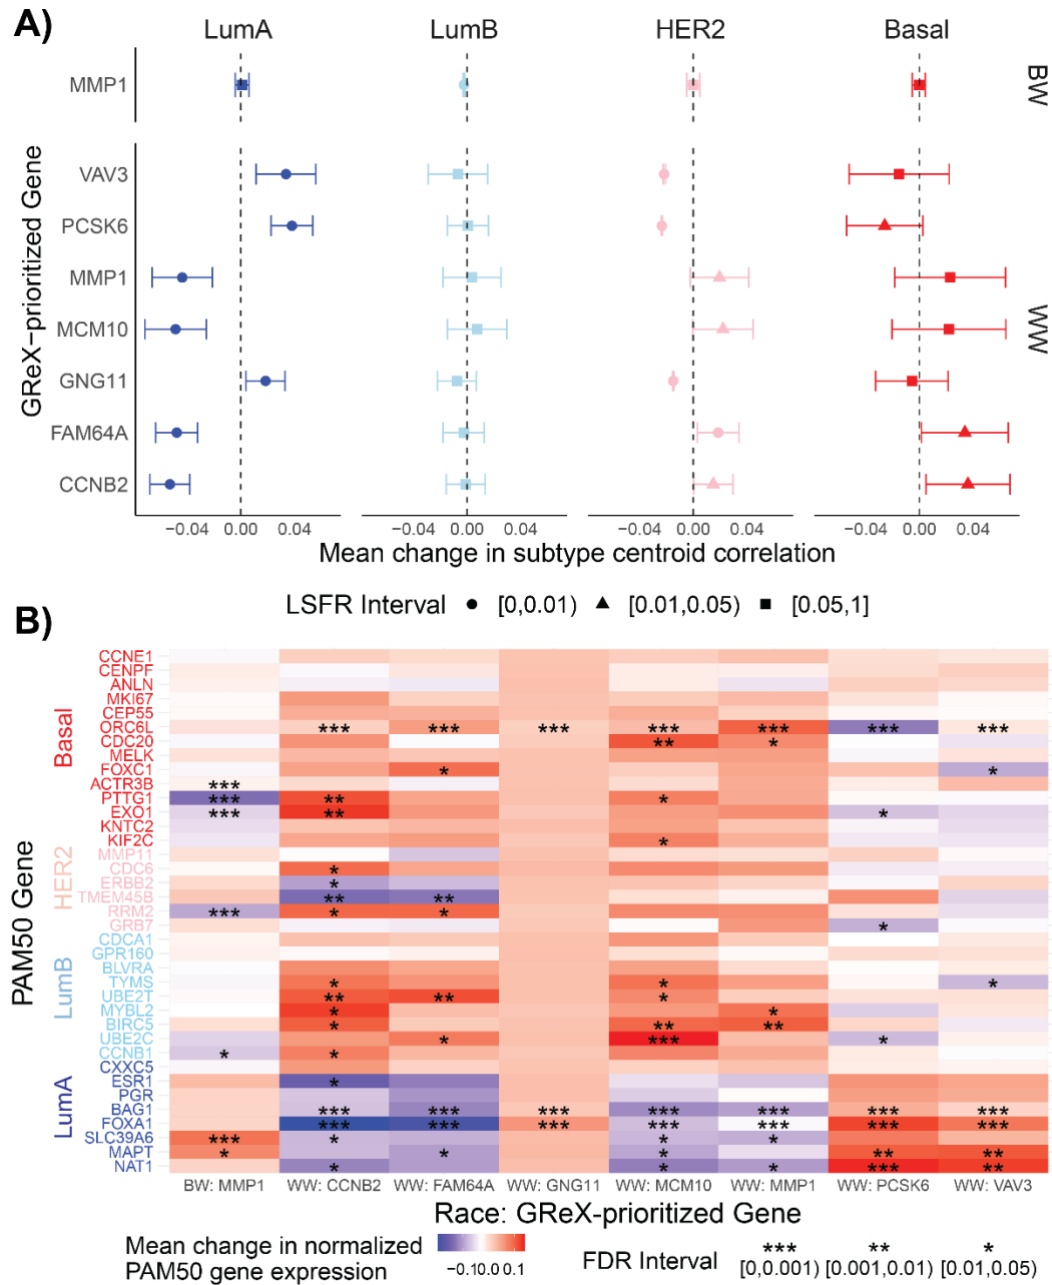

**Figure 3.** Associations between GReX-prioritized genes and PAM50 SCCs and gene expression. A) Among BW (top) and WW (bottom), associations between GReX-prioritized genes and PAM50 SCCs using Bayesian multivariate regression and multivariate adaptive shrinkage. Effect estimates show change in SCCs (range -1 to 1) for one standard deviation increase in GReX-prioritized gene GReX. Circle, triangle, and square denote corresponding LFSR intervals for effect sizes. B) Heatmap of change in log<sub>2</sub> normalized PAM50 tumor expression for one standard deviation increase in GReX-prioritized gene GReX. \*, \*\*, \*\*\* denote FDR intervals for effect sizes.



1 **TABLES**

2 **Table 1:** Race-specific associations between germline-regulated tumor gene expression (GReX) of GReX-  
 3 prioritized genes and CRS. Effect estimates correspond to change in CRS per 1 standard deviation increase in  
 4 GReX, adjusted for age, estrogen receptor status, stage, and CBCS study phase. 95% confidence intervals of  
 5 effect sizes are provided. All GReX-prioritized gene and CRS pairs shown here showed overall association FDR-  
 6 adjusted  $P < 0.10$ , and FDR-adjusted permutation  $P < 0.05$  (across 5,000 permutations of the SNP-gene  
 7 weights). We also provide signatures that include these genes as reference (**Supplementary Table S1**).

8

| Gene          | Signature   | WW (N = 1,043)          |                         |                         | BW (N = 1,083)          |                         |                         |
|---------------|-------------|-------------------------|-------------------------|-------------------------|-------------------------|-------------------------|-------------------------|
|               |             | ROR-S                   | Proliferation           | ROR-P                   | ROR-S                   | Proliferation           | ROR-P                   |
| <b>MCM10</b>  | IGF         | 3.03<br>(1.73, 4.33)    | 0.06<br>(0.03, 0.08)    | 3.11<br>(1.72, 4.50)    | -                       | -                       | -                       |
| <b>FAM64A</b> | IGF         | 2.57<br>(1.28, 3.86)    | 0.05<br>(0.02, 0.07)    | 2.64<br>(1.26, 4.02)    | -                       | -                       | -                       |
| <b>CCNB2</b>  | Estradiol   | 2.69<br>(1.40, 3.98)    | 0.05<br>(0.02, 0.08)    | 2.71<br>(1.33, 4.09)    | -                       | -                       | -                       |
| <b>MMP1</b>   | Estradiol   | 2.73<br>(1.45, 4.01)    | 0.05<br>(0.02, 0.07)    | 2.58<br>(1.21, 3.96)    | -1.84<br>(-3.12, -0.56) | -0.04<br>(-0.07, -0.02) | -2.21<br>(-3.56, -0.87) |
| <b>VAV3</b>   | Other       | -2.22<br>(-3.51, -0.93) | -0.04<br>(-0.07, -0.02) | -2.40<br>(-3.79, -1.03) | -                       | -                       | -                       |
| <b>PCSK6</b>  | IGF         | -2.16<br>(-3.45, -0.88) | -0.03<br>(-0.06, 0.00)  | -1.88<br>(-3.25, -0.50) | -                       | -                       | -                       |
| <b>GNG11</b>  | Claudin-low | -1.27<br>(-2.56, 0.02)  | -0.02<br>(-0.05, 0.00)  | -1.42<br>(-2.80, -0.05) | -                       | -                       | -                       |
